# Dendritic Morphology and Inhibitory Regulation Distinguish Dentate Semilunar Granule Cells from Granule Cells through Distinct Stages of Postnatal Development

Akshay Gupta<sup>1,3</sup>, Deepak Subramanian<sup>1,3</sup>, Archana Proddutur<sup>1,3</sup>, Yun-Juan Chang<sup>2</sup>, Vidhatri Raturi<sup>1</sup>, Jenieve Guevarra<sup>1</sup>, Yash Shah<sup>1</sup>, Fatima S. Elgammal<sup>1</sup>, and Vijayalakshmi Santhakumar<sup>1,3</sup>

<sup>1</sup>Department of Pharmacology, Physiology and Neuroscience, <sup>2</sup>Office of Advance Research Computing, Rutgers New Jersey Medical School, Newark, New Jersey 07103, <sup>3</sup>Department of Molecular, Cell and Systems Biology, University of California Riverside, California 92521.

**ORCHID ID:** Gupta A (0000-0002-3788-6277); Subramanian D (0000-0001-7109-6714); Proddutur A (0000-0003-2333-4188); Chang Y-J (0000-0003-2688-6391); Santhakumar V (0000-0001-6278-4187)

**Short Title** SGCs during postnatal development

Word count for Abstract: 249      Number of pages: 41      Number of figures: 7

## **Declarations:**

**Funding:** The project was supported by National Institutes of Health/National Institute of Neurological Diseases and Stroke R01 NS069861, R01NS097750 and New Jersey Commission on Brain Injury Research CBIR16IRG017 to V.S. and, CBIR11FEL003 to A.G

**Conflicts of interest/Competing interests:** No conflicts or competing interests to discuss

**Availability of data and material:** All reconstructions will be uploaded to Neuromorpho.org. Physiology data will be shared upon request.

**Code availability:** Standard software packages, NeuroLucida 360, pClamp10 and R were used in analysis. Custom IGOR-Pro code for IPSC analysis will be made available upon request.

**Authors' contributions:** AG, DS, JG, and AP performed experiments; AG, D.S, Y-JC, YS, and VR analyzed data; AG, DS, FSE, and VS interpreted results of experiments; AG, AP, and DS prepared figures; AG and VS conceived of and designed research; AG, DS, and VS drafted manuscript.

**Acknowledgements:** We thank Dr. Luke Fritsky at the Rutgers Imaging Core for help with imaging and Dipika Sekhar for data entry. We thank Dr. Kelly A. Hamilton for thoughtful discussions and comments.

Correspondence: **Vijayalakshmi Santhakumar, PhD**  
Department of Molecular, Cell and Systems Biology  
University of California, Riverside

E-mail: [vijayas@ucr.edu](mailto:vijayas@ucr.edu)

1

## 2 **Abstract**

3 Semilunar granule cells (SGCs) have been proposed as a morpho-functionally distinct class of  
4 hippocampal dentate projection neurons contributing to feedback inhibition and memory  
5 processing in juvenile rats. However, the structural and physiological features that can reliably  
6 classify granule cells (GCs) from SGCs through postnatal development remain unresolved.  
7 Focusing on postnatal days 11-13, 28-42, and >120, corresponding with human infancy,  
8 adolescence, and adulthood, we examined the somatodendritic morphology and inhibitory  
9 regulation in SGCs and GCs to determine the cell-type specific features. Unsupervised cluster  
10 analysis confirmed that morphological features reliably distinguish SGCs from GCs irrespective  
11 of animal age. SGCs maintain higher spontaneous inhibitory postsynaptic current (sIPSC)  
12 frequency than GCs from infancy through adulthood. Although sIPSC frequency in SGCs was  
13 particularly enhanced during adolescence, sIPSC amplitude and cumulative charge transfer  
14 declined from infancy to adulthood and were not different between GCs and SGCs.  
15 Extrasynaptic GABA current amplitude peaked in adolescence in both cell types and was  
16 significantly greater in SGCs than in GCs only during adolescence. Perforant-path evoked  
17 dentate population responses *in vivo*, conducted to assess the circuit level changes in dentate  
18 inhibition during development, revealed greater paired-pulse depression during adolescence. The  
19 data delineate the structural features that can reliably distinguish GCs from SGCs through  
20 development. The results reveal developmental differences in passive membrane properties and  
21 steady state inhibition between GCs and SGCs which could confound their use in classifying the  
22 cell types and identify parallel developmental time courses for regulation of GC and SGC tonic  
23 GABA currents and dentate feedback inhibition.

24 **Keywords:** inhibition, GABA, dentate gyrus, extrasynaptic, development, granule cell,  
25 semilunar granule cell

26 The dentate gyrus, the primary gateway for cortical inputs to the hippocampus, plays a unique  
27 role in memory processing as a center for sparse coding, mediated in large part, by strong  
28 inhibitory filtering of activity (Dengler and Coulter 2016). The classical dentate projection  
29 neurons, granule cells (GCs), which number in over a million in the rat brain, rest at more  
30 hyperpolarized potentials than most hippocampal neurons, receive powerful feedback inhibition,  
31 and project strong “detonator” synapses to CA3 enabling sparse yet reliable transmission  
32 (Dengler and Coulter 2016; Engel and Jonas 2005). Recent characterization of semilunar granule  
33 cells (SGCs), a dentate cell-type originally identified by Ramón y Cajal (1953), has revealed a  
34 second class of dentate projection neurons that are located in the inner molecular layer (IML),  
35 has distinctive somato-dendritic structure, persistent firing, and robust inhibition (Gupta et al.  
36 2012; Larimer and Strowbridge 2010; Williams et al. 2007). While SGCs have been  
37 physiologically defined in rat (Gupta et al. 2012; Williams et al. 2007), cells with dendritic  
38 morphology consistent with SGCs have been observed in primates (Duffy and Rakic 1983;  
39 Seress and Frotscher 1990). Additionally, physiological recordings from cells with  
40 morphological features of SGCs have been performed in mouse and rabbit (Sancho-Bielsa et al.  
41 2012; Save et al. 2018), indicating their presence across mammalian species. Due to their unique  
42 persistent firing in response to inputs, SGCs have been proposed to play a crucial role in  
43 regulating GC feedback inhibition, sparse coding of inputs, and pattern separation (Larimer and  
44 Strowbridge 2010; Walker et al. 2010). Recent studies suggest that SGCs are preferentially  
45 involved in memory engrams (Erwin et al. 2020). Since SGCs lack a cell-specific neurochemical  
46 marker, morphological characteristics, and lower input resistance ( $R_{in}$ ) are currently the primary  
47 approach to identify SGCs. However, the limited literature on SGC morphology and synaptic



48 inputs during development have impeded further analysis of the role of SGCs in the dentate  
49 circuit.

50 Developmentally, both SGCs and GCs express the homeodomain transcription factor Prox1  
51 (Gupta et al. 2012) and derive from the same neural precursor pool, although SGCs differentiate  
52 in a more restricted embryonic phase, demonstrating a common lineage between SGCs and GCs  
53 (Kerloch et al. 2018; Save et al. 2018). Based on the embryonic developmental analysis, SGCs  
54 are estimated at 3% of the neurons generated from the dentate neurogenic pool from which GCs  
55 derive (Save et al. 2018). Like GCs, SGCs have dendrites in the dentate molecular layer, and  
56 axons projecting to CA3. However, they can be distinguished from GCs based on their expansive  
57 dendritic span, large semi-lunar somata in the inner molecular layer (IML), and frequent  
58 presence of IML axon collaterals (Gupta et al. 2012; Williams et al. 2007). In earlier studies in  
59 rats, we defined SGCs on the basis of their wider dendritic angle (Gupta et al. 2012), which was  
60 subsequently confirmed in mice (Save et al. 2018). To date, morphometric analysis of SGCs has  
61 been limited to a narrow window of postnatal day (PD) 14-42 in rats, which is consistent with the  
62 neurological developmental state of human adolescence (Semple et al. 2013; Sengupta 2013), or  
63 in an embryonically labeled subgroup of neurons in young adult mice (Save et al. 2018).  
64 However, whether SGCs retain their distinct structural characteristics through postnatal  
65 development has not been examined. Recent studies have suggested layer specific differences in  
66 GC morphology (Kerloch et al. 2018) and disease-related changes in GC dendritic features  
67 (Freiman et al. 2011; Llorens-Martin et al. 2015; von Campe et al. 1997). However, without  
68 knowing the specific structural features that distinguish GCs from SGCs, it is difficult to  
69 interpret whether reports on changes in GC morphology reflect inclusion of structurally distinct  
70 SGCs in the datasets. Moreover, the ability to reliably distinguish SGCs from GCs across animal

71 age is a prerequisite to elucidating the unique role that SGCs play in dentate processing.  
72 Unsupervised analysis of dendritic morphometric features is ideally suited to examine whether  
73 SGCs remain distinct from GCs through development and to elucidate the somato-dendritic  
74 features that specify the cell types.

75 Physiologically, SGCs show prolonged firing, reduced spike frequency adaptation, and lower  $R_{in}$   
76 than GCs (Gupta et al. 2012; Save et al. 2018; Williams et al. 2007). Unlike GCs, SGCs respond  
77 to perforant-path stimulation with persistent firing lasting several seconds, which correlates with  
78 periods of increased hilar activity termed “up-states” (Larimer and Strowbridge 2010). SGCs  
79 have larger NMDA currents (Williams et al. 2007) than GCs, make synaptic contacts with hilar  
80 mossy cells and interneurons and have been proposed to drive granule cell feedback inhibition  
81 (Larimer and Strowbridge 2010). Apart from excitation, we previously demonstrated that SGCs  
82 have greater synaptic and extrasynaptic GABA currents (Gupta et al. 2012). Additionally, we  
83 identified that GCs and SGCs have diametrically opposite changes in synaptic and tonic GABA  
84 currents after brain injury suggesting that differences in inhibition which could contribute to  
85 distinct roles for SGCs and GCs in the dentate circuit. GCs undergo changes in both tonic and  
86 synaptic GABA currents during postnatal development (Hollrigel et al. 1998; Holter et al. 2010;  
87 Lee and Liou 2013). In parallel, studies on adult-born GCs labeled at specific time points show  
88 cell-age dependent maturation of GABA currents, ultimately reaching the levels similar to  
89 mature GCs in age-matched animals (Dieni et al. 2012; Li et al. 2012). Yet, whether inhibition  
90 in SGCs remains distinct from mature GCs through postnatal development is not known. While  
91 GCs show prolonged functional maturation (Yu et al. 2013a), age-dependent changes in  
92 inhibitory regulation of SGCs remains to be tested. This study was conducted to explicitly to  
93 determine the characteristic structural features which can be used to distinguish SGCs from GCs

94 through postnatal developmental stages representing infancy ( PD 11-13, prior to rodent eye  
95 opening), adolescence (PD 28-42 days, period of cortical maturation), and adult (> PD 120,  
96 cortical and sexual maturity) stages of development (Semple et al. 2013) and to identify the  
97 differences in steady-state inhibitory regulation of the two cell types through maturation of the  
98 dentate circuit.

## 99 **Materials and Methods**

100 **Animals.** All experiments were performed in accordance with IACUC protocols approved by  
101 Rutgers-NJMS, Newark, NJ, and the University of California at Riverside, CA and in keeping  
102 with the ARRIVE guidelines. The study included Wistar rats ranging in age from 11-13 days,  
103 28-42 days, and 120-180 days designated as infancy, adolescence, and adulthood, respectively  
104 (Semple et al. 2013; Sengupta 2013). Due to the potential effects of hormonal variation on  
105 GABA currents, slice recordings in rats from >28 days were restricted to males. A subset of  
106 recordings was derived from surgical or saline-injected controls for an independent study and  
107 was pooled with data from naïve rats from which they showed no statistical difference.

108 **Slice Physiology.** Rats were anesthetized with isoflurane and decapitated. Horizontal brain  
109 slices (300 $\mu$ m) were prepared in ice-cold sucrose artificial cerebrospinal fluid (sucrose-aCSF)  
110 containing the following (in mM): 85 NaCl, 75 sucrose, 24 NaHCO<sub>3</sub>, 25 glucose, 4 MgCl<sub>2</sub>, 2.5  
111 KCl, 1.25 NaH<sub>2</sub>PO<sub>4</sub>, and 0.5 CaCl<sub>2</sub> using a Leica VT1200S Vibratome. The slices were sagittally  
112 bisected and incubated at 32°C for 30 min in a submerged holding chamber containing an equal  
113 volume of sucrose-aCSF and recording aCSF, and subsequently were held at room temperature.  
114 The recording aCSF contained the following (in mM): 126 NaCl, 2.5 KCl, 2 CaCl<sub>2</sub>, 2 MgCl<sub>2</sub>,  
115 1.25 NaH<sub>2</sub>PO<sub>4</sub>, 26 NaHCO<sub>3</sub>, and 10 D-glucose. All solutions were saturated with 95% O<sub>2</sub> and  
116 5% CO<sub>2</sub> and maintained at a pH of 7.4 for 1–6 h. Slices were transferred to a submerged  
117 recording chamber and perfused with oxygenated aCSF at 33°C. Whole-cell voltage-clamp  
118 recordings from neurons in the dentate granule cell layer (GCL) and inner molecular layer (IML)  
119 were performed using infrared differential interference contrast visualization techniques (Gupta  
120 et al. 2012; Yu et al. 2016) with a Nikon Eclipse FN-1 microscope, using a 40X, 0.80 NA water-  
121 immersion objective. Cells in the hilar-GCL border were not included in the study. Recordings

122 were obtained using MultiClamp 700B (Molecular Devices). Data were low pass filtered at 3  
123 kHz, digitized using Digidata 1440A, and acquired using pClamp10 at 10 kHz sampling  
124 frequency. Tonic and synaptic GABA currents were recorded in aCSF with no added GABA or  
125 GABA transporter antagonists in the recording solution (Gupta et al. 2012; Yu et al. 2013b).  
126 Voltage-clamp recordings of inward GABA currents were obtained from a holding potential of -  
127 70 mV using microelectrodes (5–7 M $\Omega$ ) containing (in mM): 125 CsCl<sub>2</sub>, 5 NaCl, 10 HEPES, 2  
128 MgCl<sub>2</sub>, 0.1 EGTA, 2 Na-ATP, and 0.5 Na-GTP, titrated to a pH 7.25 with CsOH. Biocytin  
129 (0.2%) was included in the internal solution for post hoc cell identification, and the glutamate  
130 receptor antagonist kynurenic acid (3 mM KynA, Tocris Bioscience) was included in the external  
131 solution to isolate GABA currents. Passive membrane properties including resting membrane  
132 potential and R<sub>in</sub> were recorded in current clamp using an internal containing (in mM) 126 K-  
133 gluconate, 4 KCl, 10 HEPES, 4 Mg-ATP, 0.3 Na-GTP, 10 Phosphocreatine and 0.2% biocytin  
134 (Gupta et al. 2012). Among neurons recorded in the IML, only cells showing obtuse dendritic  
135 angles, presence of dendritic spines and axon projecting to the hilus (Gupta et al. 2012)  
136 (Supplementary Figure 1) were included in the physiological analysis as putative SGCs. The  
137 somata of all GCs included in the analysis were located in the GCL. Recordings were  
138 discontinued if series resistance increased by >20%. Access resistance was not different between  
139 cell-types or between developmental groups. Following establishment of whole cell mode,  
140 baseline recordings were obtained for a minimum of five minutes in the presence of KynA prior  
141 to addition of GABA blockers. Recordings with excessive baseline fluctuations during the 3-5  
142 minutes of recordings in KynA were discarded. All salts were purchased from Sigma-Aldrich  
143 (St. Louis, MO). Tonic GABA current, the steady-state current blocked by the GABA<sub>A</sub>R  
144 antagonist bicuculline methiodide (BMI, 100 $\mu$ M, Sigma-Aldrich) or gabazine (SR95531, 10  $\mu$ M,

145 Sigma-Aldrich), was measured as described previously (Gupta et al. 2012; Yu et al. 2013b) using  
146 custom macros in IgorPro7.0 software (WaveMetrics). Following physiological recordings,  
147 slices were fixed in 0.2mM phosphate buffer containing 4% paraformaldehyde at 4°C for 2 days.  
148 Biocytin staining was revealed using Alexa Fluor 594-conjugated streptavidin (Gupta et al. 2012;  
149 Swietek et al. 2016).

150 **Morphometry and hierarchical cluster analysis.** Sections were visualized and imaged using a  
151 Zeiss LSM 510 confocal microscope with a 20X, 0.5 NA objective. Cell reconstructions from  
152 confocal image stacks were performed using the directional kernels user-guided reconstruction  
153 algorithm in NeuroLucida 360 (MBF Bioscience) followed by manual correction and validation  
154 in 3D. About 10-20 percent of each dendritic arbor was reconstructed manually. NeuroLucida  
155 Explorer (MBF Biosciences) was used to extract non-nominal or non-ordinal somatodendritic  
156 morphological quantitative parameters (defined in Supplementary Tables 1 & 2) for use in  
157 statistical comparisons and hierarchical cluster analysis. A total of 42 projection neurons in  
158 which the dendritic arbors were fully reconstructed were analyzed. The software failed to  
159 quantify a subset of somatic parameters in 6 cells, and these cells were excluded from cluster  
160 analysis.

161 Data were tested for uniform distribution and each quantified variable was fit to the sum of two  
162 or more Gaussian functions and quality of fit determined using maximum likelihood analysis  
163 (MLA; v2test) to assess normal distribution of parameters within each cell type. Variables with a  
164 nonuniform distribution were used for subsequent cluster analysis. A total of 42 somato-dendritic  
165 parameters (Supplementary Tables 1 & 2) from 36 morphologically reconstructed neurons,  
166 including both features measured in NeuroLucida Explorer from the 3D reconstructions and  
167 parameters measured manually in 2D rendering (NeuroLucida 360, MicroBrightfield) were

168 analyzed. Unsupervised clustering and principal component analyses of morphological properties  
169 were conducted within R version 3.5.0, using R package Cluster, FactoMineR, and factoextra by  
170 an investigator (Y-J C) blinded to cell types and age groups. Hierarchical clustering on the  
171 selected principal components (PCs) was performed using Ward's Criterion with Euclidean  
172 distance to generate the dendrogram. The clustering partition was obtained from hierarchical  
173 clustering and improved with K-means method (Husson et al. 2010). Summary of morphological  
174 data and statistical analysis of morphometric parameters are presented in Supplementary Tables  
175 3 and 4, respectively.

176 **In Vivo Recordings:** Animals were anesthetized using urethane (1.5g/kg, i.p.) and all recordings  
177 commenced 60-90 minutes post induction following confirmation of surgical anesthesia. Rats  
178 were secured in a stereotaxic frame and placed on a warming pad (Stoelting) to maintain optimal  
179 body temperature (37°C) throughout the experiments. Platinum-Iridium Concentric bipolar  
180 stimulating electrodes (Microprobes) were used to stimulate medial perforant path (mPP) (AP: -4  
181 mm, ML: +3mm, DV: -1.5mm from bregma for infant, ML: +4-4.2 mm, DV: -2mm from lambda  
182 for adolescent and adult). A single tungsten wire electrode (50 $\mu$ m diameter, California Wire  
183 Company) was positioned in the GCL guided by responses evoked by mPP stimulation (0.6mA,  
184 150 $\mu$ s, 0.1Hz monophasic pulses; ISOflex, AMPI Israel). Coordinates used for dentate gyrus  
185 were, from bregma, AP: -2 mm, ML: +1.5 mm, DV: -2.2-2.5mm for infant, AP: -3.5 mm, ML:  
186 +2 mm, DV: -3mm for adolescent, and AP: -4 mm, ML: +2mm, DV: -3.5mm for adult animals.  
187 Final electrode positions were optimized for maximal evoked responses. Paired-pulse responses  
188 were evoked with a 20ms interval between pulses, averaged over 5 sweeps each (0.8-1mA, 150  
189  $\mu$ s, 0.1Hz, monophasic pulse). Current intensity was adjusted to levels that reliably produced  
190 population spike amplitude of 0.5mV or more. Adolescent and adult animals were transcardially

191 perfused with 0.9% saline followed by 4% PFA and brains were extracted for histological  
192 confirmation of electrode track. Population spike amplitude was measured as detailed previously  
193 (Neuberger et al. 2017). Paired pulse ratio was calculated as the amplitude of population spike 2  
194 /population spike1. Evoked responses were recorded and analyzed using LabChart 8.0 (AD  
195 Instruments). Data from animals in which the paired pulse ratio was  $>1$ , indicative of stimulating  
196 electrode in the lateral perforant path, were excluded.

197

198 **Analysis and Statistics:** Individual spontaneous inhibitory postsynaptic currents (sIPSCs) were  
199 detected using custom software in Igor-Pro7.0 (Gupta et al. 2012). The investigator (AG) was  
200 blinded to cell type during analysis. Events were visualized, and any “noise” that spuriously met  
201 trigger specifications was rejected. Cumulative probability plots of sIPSC amplitude and  
202 frequency were constructed using IgorPro by pooling an equal number of sIPSCs from each cell.  
203 Kinetics and charge transfer were calculated from the averaged trace of all accepted sIPSC  
204 events. Rise time was measured as the time for amplitude to change from 20 to 80 % of peak.  
205 Amplitude weighted  $\tau_{\text{decay}}$  was calculated from a two-exponential fit to the IPSC decay. sIPSC  
206 charge transfer was calculated as the area under the curve of the baseline adjusted average sIPSC  
207 trace. The summed sIPSC charge transfer over one second was calculated as the product of the  
208 sIPSC charge transfer and sIPSC frequency for each cell.  $R_{\text{in}}$  was calculated as the slope of the  
209 current voltage plots with voltage response (averaged over the last 400 ms) to one second current  
210 injections from -200pA to -40 pA (in 40 pA steps) in each cell. Membrane time constant  
211 ( $\tau_{\text{membrane}}$ ) was obtained from a single exponential fit to the voltage response to a -200pA current  
212 injection. Data are shown as mean $\pm$ SEM (standard error of the mean) or median and interquartile  
213 range (IQR) where appropriate and presented in Supplementary Table 5. Kruskal-Wallis One



214 Way Analysis of Variance on ranks was conducted on data which failed Shapiro Wilk test for  
215 normalcy or equal variance test. Two-way ANOVA (TW-ANOVA, SigmaPlot 12.3) and  
216 Bonferroni correction was used to test for statistical differences in tonic GABA currents.  
217 Summary data and details of the statistical tests used are included in Supplementary Tables 5-8.  
218 Sample sizes were not predetermined and conformed with those employed in the field.  
219 Significance was set to  $p < 0.05$ , subject to appropriate Bonferroni correction. All custom macros  
220 for analysis and data sets will be made available on request upon publication of the study.

221

222

## 223 **Results**

### 224 **Somato-dendritic characteristics distinguish SGCs from GCs throughout postnatal** 225 **development.**

226 To examine whether SGCs are structurally distinct from GCs throughout postnatal development,  
227 we undertook electrophysiological recordings from putative GCs and SGCs in the GCL and IML  
228 respectively, and filled cells with biocytin to recover their morphology. As illustrated by  
229 morphological reconstructions obtained from confocal images of biocytin filled neurons (Fig. 1),  
230 putative GCs exhibit compact molecular layer dendritic arbors while putative SGCs recorded in  
231 the IML consistently exhibited wider dendritic spread. These differences in dendritic spread are  
232 maintained throughout the three developmental stages tested. Additionally, the X-Y plane  
233 projection of the reconstructed neurons revealed the characteristic crescent shaped somata of  
234 SGCs. Figure 1 illustrates pseudo color rendering of dendritic arbors with segments assigned on  
235 the basis of branch order in 3D reconstructions in NeuroLucida 360. Color coding of the  
236 dendritic segments revealed that, in addition to differences in dendritic span, SGCs differed from  
237 GCs in the extent to which individual dendritic trees branched and the number of segments in  
238 different dendritic orders. Moreover, reconstructions suggest that GCs have a dense distribution  
239 of dendritic arbors in a compact volume while SGCs appear to have sparsely distributed  
240 dendrites in a larger volume. Thus, while 3D reconstructions demonstrate that SGCs maintain a  
241 *qualitative* pattern of dendritic arborization distinct from GCs at all postnatal ages examined,  
242 they reveal additional morphometric features which differ between cell types indicating a need  
243 for comprehensive unsupervised *quantitative* analysis of dendritic structure.

244 To determine if somato-dendritic parameters distinguish GCs from SGCs through development,  
245 we undertook the first unsupervised classification of dentate projection neurons on the basis of  
246 morphometry. Projection neurons were identified based on the presence of somata in the GCL or  
247 IML, axons with boutons entering the hilus and targeting CA3 (Supplementary Figure 1).  
248 Additionally, we find that both SGCs and GCs, have a high density of dendritic spines  
249 (Supplementary Figure 1), which we used as a criterion to distinguish projection neurons from  
250 local interneurons when the axon was not fully recovered. Morphometric parameters of the cells  
251 reconstructed in 3D were obtained from automated algorithms in NeuroLucida 360 (definitions  
252 are included in Supplementary Tables 1 and 2). Principal Component Analysis (PCA) of 42  
253 distinct morphometric parameters from 36 cells revealed a relatively high dimensional structure.  
254 The first three principal components (PCs) explained about 46% of the total variance in the data,  
255 while the first seven components retained over 85% of the variance (Supplementary Figure 2).  
256 PCA analysis of individual cells was projected on to the first three principal components and  
257 visualized in 3D representation with confidence interval (CI) ellipsoid set to 0.95, which  
258 suggested that the cells likely segregate by cell type (Fig. 2A) rather than developmental age of  
259 the rat (Fig. 2B).

260 Interestingly, clustering by PCA matched that of the investigator (Fig. 2). A total of 36 dentate  
261 projection neurons (16 cells in infant, 10 cells in adolescent and 10 cells in adult), recovered  
262 based on the quantitative morphological features, were included in the clustering analysis. A  
263 hybrid approach of hierarchical clustering on principal components (HCPC) which helps in de-  
264 noising multidimensional dataset was adopted (Husson et al. 2010). HCPC on the first seven  
265 components suggested two cluster partitioning groups (Fig 2C). Opening of the blinding revealed  
266 that the two putative clusters demonstrated a tendency for cells to cluster by putative cell-type.

267 Cluster 1 included 16 cells classified as GCs and five classified as an SGC by the investigator.

268 Clusters 2 consisted entirely of cell classified as SGCs by the investigator (A.G).

### 269 **Identity of principal morphometric parameters that best represent the PCs**

270 The PCs were examined further to identify the top five morphological variables which best  
271 represent the PC ( $\cos^2 \geq 0.7$ ) and the morphological features that contributed to PC variability  
272 (Supplementary Figure 2). The number of first, second, and third order dendritic segments (note:  
273 number of first order dendritic segments equals number of primary dendrites), number of second  
274 order nodes and soma width were the top five morphological features that best represented the  
275 PCs while dendritic area and volume contributed most to variability (Supplementary Figure 2).  
276 Although the dendritic span and angle, used by the experimenter for classification (Gupta et al.  
277 2012; Williams et al. 2007), contributed to the PC, morphology-based clustering revealed  
278 additional salient parameters including number of primary dendrites and dendritic segmentation  
279 which differed between clusters. Interestingly, one of the cells classified as SGCs by the  
280 investigator which clustered with putative GCs by unsupervised clustering was located in the  
281 IML (a feature that was not included in the cluster analysis), had a wide dendritic angle, but had  
282 more than one primary dendrite, typically seen in GCs, with complex pattern of branching which  
283 could have driven the clustering with GCs (Supplementary Figure 2D). Importantly, comparison  
284 of cell classification based on the unsupervised approach to that of the investigator (A.G.)  
285 confirmed that the investigator and PCA-based classifier agreed on the “grouping” of >85% (31  
286 of 36) of cells examined. These findings confirm that GCs and SGCs are structurally distinct and  
287 demonstrate that the investigator can reliably discriminate the cell-types.

### 288 **Developmental changes in somato-dendritic morphology of dentate projection neurons**

289 Using the investigator-assigned classifications, we next examined which specific morphological  
290 parameters showed cell-type and developmental differences. First, we focused on the parameters  
291 that contributed to PCs underlying cell classification. As predicted based on the PCA, the  
292 number of primary dendrites (first order segments), second order segments and nodes were  
293 different between SGCs and GCs, with SGCs having significantly more dendritic segments in the  
294 first three orders of dendrites (Fig. 3A, Supplementary Figure 3 & Supplementary Tables 3 &4).  
295 However, the effect of *age* on the number of segments in each order was not statistically  
296 significant (Supplementary Figure 3A&B, Supplementary Tables 3 & 4). Similarly, soma width  
297 and dendritic angle were greater in SGCs and failed to show age related changes (by TW-  
298 ANOVA; Fig. 3B&C, and Supplementary Tables 3 & 4). Thus, these parameters are ideally  
299 suited to distinguish cell-types regardless of age. In contrast, dendritic length showed a  
300 significant effect of age yet was not different between cell types (Fig. 3D, and Supplementary  
301 Tables 3 & 4). Of note, SGCs had significantly lower dendritic complexity than GCs and failed  
302 to show the age-dependent increase in complexity observed in GCs (Fig. 3E, and Supplementary  
303 Tables 3 & 4). Additional parameters that reflected 3D dendritic structure including convex hull  
304 surface area showed significant differences between cell-type and with age (Fig. 3F,  
305 Supplementary Tables 3 & 4). The convex hull surface area increased with development from  
306 infancy to adolescence and remained at adolescent levels in the adult (Fig. 3F, and  
307 Supplementary Tables 3 & 4) and appeared to contribute substantially to variability in the PCA  
308 analysis of pooled morphometric dataset (Supplementary Figure 2B). Finally, certain summed  
309 dendritic parameters including total numbers of dendritic terminals (ends), nodes, and segments  
310 showed neither cell-type nor age related differences (Supplementary Figure 3D-F,  
311 Supplementary Tables 3 & 4).

312

### 313 **Developmental changes in spontaneous synaptic inhibition to GCs and SGCs**

314 We previously demonstrated that SGCs from adolescent rats receive a greater frequency of  
315 action-potential driven sIPSCs than GCs from age-matched rats (Gupta et al. 2012). To  
316 determine if SGC inhibitory drive changes through postnatal development, we recorded sIPSCs  
317 from SGCs and GCs at three developmental stages. As illustrated in Fig. 4, SGCs consistently  
318 showed a higher frequency of sIPSCs compared to GCs from age matched rats. Both cell-types  
319 showed changes in sIPSC frequency with age. The frequency of sIPSCs in GCs increased from  
320 infancy through adolescence, peaked at adolescence and showed a slight, yet, significant  
321 decrease in adults. (Fig. 4D, Supplementary Figure 4 and Supplementary Tables 5 & 6). Despite  
322 the decrease from adolescence to adulthood, the sIPSC frequency in GCs from adults was higher  
323 than that in infancy. SGCs, on the other hand, showed a distinct peak in sIPSC frequency during  
324 adolescence with a significant reduction in frequency in adults, back to the levels observed in  
325 infancy (Fig. 4D, Supplementary Figure 4, and Supplementary Tables 5 & 6). Thus, despite  
326 being consistently higher than in GCs, sIPSC frequency in SGCs appears to show a specific and  
327 transient enhancement during adolescence.

328 Unlike sIPSC frequency, SGC sIPSC amplitude did not differ from age-matched GCs in infant  
329 and adolescent rats (Fig. 5C and Supplementary Tables 5 & 6), consistent with our earlier reports  
330 in adolescent rats (Gupta et al. 2012). However, in adult rats, sIPSC amplitude in GCs was larger  
331 than in SGCs (Fig. 5C). In GCs, sIPSC amplitude decreased significantly from infancy to  
332 adolescence and remained constant thereafter with differences in sIPSC between adolescence  
333 and adulthood not reaching statistical significance (Fig. 5C, Supplementary Tables 5 & 6). sIPSC

334 amplitude in SGCs decreased through postnatal development with a significant reduction from  
335 infancy to adolescence, and a further decline from adolescence to adulthood (Fig. 5C,  
336 Supplementary Tables 5 & 6).

337 Since distal inhibitory inputs can attenuate to a smaller amplitude at the soma (Soltesz et al.  
338 1995), we sought to assess whether changes in the proportion of proximal versus distal dendritic  
339 synaptic inputs could contribute to developmental change in GC and SGC sIPSC amplitude. To  
340 determine if there is a systematic change in the amplitude of sIPSCs with age, we assigned  
341 sIPSCs to two groups based on their amplitudes: large and putative proximal and perisomatic  
342 (>50pA), and small (<50pA), potentially dendritic and calculated the proportion of these events  
343 classes in GCs and SGCs during development. Consistent with the developmental increase in  
344 dendritic length (Fig.3D), the proportion of large amplitude, presumed perisomatic events  
345 (>50pA) were highest in infants and reduced progressively with age while the smaller amplitude  
346 events <50pA events increased with age in both the cell types (Supplementary Figure 5). These  
347 findings suggest that developmental increase in dendritic length may contribute to decline in  
348 sIPSC amplitude over age in both cell types.

349 Systematic analysis of sIPSC kinetics identified an overall decline in  $\tau_{\text{decay-WT}}$  in GCs with a  
350 significant reduction from infant to adolescent rats (Fig. 5D, Supplementary Table 5 & 7).  
351 Similarly, 20-80 rise time in GCs showed an overall decline with age with a significant reduction  
352 from infancy to adulthood (Fig. 5E, Supplementary Table 5 & 7). In contrast, both sIPSC 20-80  
353 rise time and  $\tau_{\text{decay-WT}}$  increased from infancy through adulthood in SGCs demonstrating a  
354 divergence in the effect of development on sIPSC kinetics between GCs and SGCs. Since the  
355 developmental changes in both sIPSC rise and  $\tau_{\text{decay-WT}}$  showed parallel trends within a given cell

356 type while differing between cell types, we evaluated whether developmental changes in cellular  
357 passive membrane parameters may underlie these changes. Consistent with the changes observed  
358 in sIPSC kinetics in GCs, both  $R_{in}$  and membrane time constant ( $\tau_{membrane}$ ) trended to decline  
359 from infancy through adulthood with the decrease in  $R_{in}$  reaching statistical significance  
360 (Supplementary Fig. 6, Supplementary Tables 5 & 8). As with sIPSC kinetics in SGCs, both  
361  $R_{in}$  and  $\tau_{membrane}$  increased significantly from infancy through adulthood (Supplementary Fig. 6,  
362 Supplementary Tables 8). While direct correlation of the sIPSC kinetics with  $\tau_{membrane}$  was not  
363 feasible due to use of different cohorts of recordings for sIPSC and passive parameter data, the  
364 results are consistent with a role for developmental changes in membrane passive properties  
365 contributing to the shift in sIPSC kinetics in cell types with postnatal development. Moreover,  
366 the data demonstrate that postnatal development has an opposite effect on  $R_{in}$  in GCs and SGCs.  
367  $R_{in}$  in SGCs was lower than in GCs in infant and adolescent rats, a feature that has been used to  
368 distinguish the cell types (Erwin et al. 2020). However, in adult rats,  $R_{in}$  in SGCs was  
369 significantly higher than age matched GCs (Supplementary Fig. 6, Supplementary Tables 5 & 8)  
370 revealing that a lower  $R_{in}$  cannot consistently distinguish SGCs from GCs across all  
371 developmental time points.

372 Given the developmental and cell-specific changes in sIPSC peak amplitude and kinetics, we  
373 examined whether GCs and SGCs showed changes in sIPSC charge transfer during postnatal  
374 development. Consistent with changes in peak amplitude, sIPSC charge transfer declined with  
375 development in both cell types (Fig. 5F, Supplementary Tables 5 & 7). Despite the changes in  
376 kinetics, the net charge transfer was not different between GCs and SGCs from age-matched rats  
377 (Fig. 5F, Supplementary Tables 5 & 6). To comprehensively assess spontaneous synaptic  
378 inhibition in GCs and SGCs during development in a manner that would include divergent



379 changes in frequency amplitude and kinetics between cell-types and during development, we  
380 estimated the cumulative sIPSC charge transfer over one second as a product of the sIPSC  
381 frequency and charge transfer for each cell. Interestingly, the cumulative sIPSC charge transfer  
382 over one second was maximum during infancy and declined with development in both GCs and  
383 SGCs (Supplementary Fig. 4C, Supplementary Table 5 & 7). Moreover, the cumulative sIPSC  
384 charge transfer over one second was not different between cell-types at any developmental stage  
385 examined (Supplementary Fig. 4C, Supplementary Table 5 & 7).

### 386 **Extrasynaptic GABA currents in SGCs peak during adolescence**

387 Apart from GABAergic synaptic inputs, dentate GCs are known to express extra- and peri-  
388 synaptic GABA<sub>A</sub> receptors that contribute to steady-state tonic GABA currents (Stell et al.  
389 2003). We previously demonstrated the presence of tonic GABA currents in SGCs and identified  
390 that the amplitude of tonic GABA current in SGCs was greater than in age-matched adolescent  
391 GCs (Gupta et al. 2012). Here we find that although tonic GABA current amplitude in SGCs,  
392 measured as the baseline currents blocked by a saturating concentration of GABA<sub>A</sub> receptor  
393 antagonists, was significantly greater than in GCs during adolescence, tonic GABA<sub>A</sub> current  
394 amplitude was not different between GCs and SGCs during infancy or adulthood (Fig. 6). Both  
395 GCs and SGCs showed a significant increase in tonic GABA currents from infancy to  
396 adolescence which returned back to pre-adolescent levels in adults (Fig. 6 and Supplementary  
397 Tables 5 & 6).

398

399

## 400 **Enhanced inhibitory regulation of dentate activity *in vivo* during adolescence**

401 Developmental shifts in GABAergic inhibition would be expected to alter dentate output in  
402 response to input activation. Having assessed spontaneous and tonic steady state synaptic  
403 inhibition in dentate projection neuronal classes during development we sought to assess whether  
404 dentate inhibition at the level of the circuit tracked the developmental profiles of synaptic  
405 inhibitory charge transfer which declined with development or extrasynaptic inhibition which  
406 was selectively enhanced during adolescence. Paired stimuli to the angular bundle evoked with  
407 an interval of 20 ms have been reliably used to evaluate hippocampal network inhibition by local  
408 neurons (Jedlicka et al. 2010; Jedlicka et al. 2011). *In vivo* examination of GCL population  
409 response evoked by a pair of stimuli to the angular bundle at 20 ms interval in infant, adolescent,  
410 and adult rats identified a significant decrease in paired pulse ratios (PPR) in adolescent group  
411 compared to infant and adult groups (Fig. 7; PPR:  $0.28 \pm 0.03$  in  $n=7$  adolescents vs.  $0.79 \pm 0.06$  in  
412  $n=8$  infants and  $0.61 \pm 0.09$  in  $n=6$  adults;  $p < 0.05$ , Kruskal-Wallis one way ANOVA on ranks).  
413 In line with previous developmental studies evaluating PPR in rats (DiScenna and Teyler 1994),  
414 we did not see a significant difference in PPR between the infants and adult groups. Although the  
415 magnitude of steady-state inhibition may not reflect recruitment of inhibition during afferent  
416 activation, results from anesthetized rats *in vivo* demonstrating heightened feedback inhibitory  
417 regulation of dentate activity during adolescence parallel the developmental peak in tonic  
418 inhibition in GCs and SGCs in adolescent rats.

419

420 **Discussion:**

421 Contemporary literature on the dentate gyrus describes the projection neurons as a largely  
422 homogeneous population of GCs with limited diversity (Kesner 2018). Since GCs are a unique  
423 subset of neurons that undergo neurogenesis and maturation through adulthood, structural and  
424 functional diversity in GCs is largely attributed to the maturation state of neurons within the  
425 circuit (Toda and Gage 2018). At any given postnatal developmental stage of the animal,  
426 immature GCs tend to be located closer the hilar border of the cell layer, have less elaborate  
427 dendritic structures and are functionally more excitable than their mature counterparts (Kerloch  
428 et al. 2018; Overstreet-Wadiche and Westbrook 2006). However, emerging recognition of a  
429 structurally and functionally distinct subset of dentate projection neurons challenges the  
430 prevailing view that dentate projection neurons are a homogenous class of cells distinguished by  
431 developmental stages (Gupta et al. 2012; Save et al. 2018; Williams et al. 2007). SGCs, which  
432 have been characterized in the IML of the dentate gyrus, differ from GCs in their expansive  
433 dendritic arbors and show more sustained firing activity (Larimer and Stowbridge 2010;  
434 Williams et al. 2007). These and other features, including their distinct window of embryonic  
435 day 12-15 for SGC development (Save et al. 2018), enhanced excitatory drive (Larimer and  
436 Stowbridge 2010), and distinct synaptic and extrasynaptic inhibitory currents (Gupta et al. 2012)  
437 indicate that SGCs are distinct from GCs. Although SGCs have been proposed to sculpt feedback  
438 inhibition of GCs, gate dentate activity, and contribute to memory processing (Larimer and  
439 Stowbridge 2010; Walker et al. 2010), there is limited information on the structural and  
440 physiological differences between GCs and SGCs across postnatal development of the animal.  
441 This information is needed to determine which features consistently and reliably distinguish the  
442 cell types at all age groups. Our detailed and objective morphometric analysis conducted at three

443 distinct developmental stages, namely, infant, adolescent and adult age groups demonstrates that  
444 clustering dentate projection neurons based on somato-dendritic morphology distinguishes them  
445 into different “subtypes” corresponding to SGCs and GCs. Additionally, SGCs consistently  
446 maintained higher frequency of inhibitory synaptic inputs than GCs at all ages. Our results  
447 demonstrate that although both GCs and SGCs exhibit peaks in frequency of synaptic inhibitory  
448 inputs and magnitude of tonic GABA currents during adolescence, these parameters were  
449 significantly higher in SGCs than in GCs at this time point. However, the peak sIPSC amplitude  
450 and cumulative charge transfer were highest in infants, decreased with development and were not  
451 different between cell types. These findings demonstrate that SGCs are a structurally and  
452 functionally distinct subtype of dentate projection neurons which is in keeping with the emerging  
453 recognition of subpopulations among hippocampal and entorhinal projection neurons (Pilli et al.  
454 2012; Soltesz and Losonczy 2018). Moreover, the significantly heightened tonic inhibition in  
455 SGCs during adolescence suggests that SGC activity could be more strongly modulated than  
456 GCs by a variety of neuroactive compounds including alcohol and neurosteroids, which  
457 selectively augment extrasynaptic GABA currents (Maguire and Mody 2009; Mody et al. 2007).  
458 Interestingly, *in vivo* analysis of paired pulse inhibition, demonstrated that feedback inhibition at  
459 the level of the network was maximal during adolescence. While the parallel peak in feedback  
460 inhibition *in vivo* and tonic GABA currents during adolescence are intriguing, it is paradoxical  
461 that dentate feedback inhibition is enhanced when SGCs, which have been proposed to drive  
462 feedback inhibition, are under relatively higher tonic inhibitory regulation. These findings raise  
463 the possibility that higher extrasynaptic inhibitory tone in SGCs may be a compensatory  
464 mechanism to reduce feedback inhibition during adolescence. Future studies examining this

465 possibility coupled with developmental changes in excitatory drive and active properties of GCs  
466 and SGCs can provide a more comprehensive understanding of the network role of SGCs.

467 In addition to using unbiased approaches to classify SGCs as a distinct neuronal class, our data  
468 identify key age-invariant features to distinguish the SGCs from GCs. We find that the number  
469 of primary dendrites, dendritic angle, and soma ratio are significantly higher in SGCs and can be  
470 used to categorize SGCs and GCs. In particular, the multiple primary dendrites observed in  
471 SGCs stands in stark contrast to the typical one to two apical dendrites observed in granule cell  
472 reconstructions (Thind et al. 2008). Indeed, the striking >85% correspondence between the  
473 unsupervised clustering and investigator assigned clustering likely stems from the investigator's  
474 use of dendritic angle, soma width, which are significant contributors to the first PC, in addition  
475 to soma location to classify cell types. Dendritic length, on the other hand, increased during  
476 development but was not different between cell types indicating that processes reflecting  
477 developmental maturation are common to the cell types. Consistent with the presence of larger  
478 dendritic angle, the convex hull 3D volume and 3D surface area of SGCs were greater than that  
479 of GCs. However, there was also a developmental increase in these parameters from infancy to  
480 adolescence and a further stabilization into adulthood in both cell types, likely reflecting the  
481 developmental increase in hippocampal volume. Interestingly, although the number of terminal  
482 nodes was not different, the dendritic complexity was significantly lower in SGCs than in GCs  
483 demonstrating differences in branching patterns. Difference in branching patterns including  
484 dendritic complexity can impact neuronal firing and intracellular signaling, as has been  
485 demonstrated in modeling studies (Li et al. 2015; van der Velden et al. 2012; van Elburg and van  
486 Ooyen 2010). Whether dendritic morphology can account for differences in intrinsic physiology  
487 between the dentate projection neuron types (Gupta et al. 2012; Save et al. 2018; Williams et al.

488 2007) remains to be examined. The other aspect where distinguishing cell type based on  
489 morphology becomes critical is in disease. Dentate granule cells are known to undergo changes  
490 in dendritic structure including alterations in complexity under physiological conditions and in  
491 trauma and neurodegenerative diseases (Llorens-Martin et al. 2015; Redila and Christie 2006;  
492 Villasana et al. 2015). The ability to distinguish GCs and SGCs across multiple developmental  
493 stages would be crucial to quantifying and interpreting changes in morphology in trauma,  
494 epilepsy, and neurodegenerative disease.

495 While there are clear differences in the structure, SGCs and GCs share several characteristics.  
496 Both SGCs and GCs are projection neurons, with dendrites in the dentate molecular layer and  
497 axons projecting to hippocampal CA3 (Gupta et al. 2012; Save et al. 2018; Williams et al. 2007).  
498 Several dendritic parameters including total numbers of dendritic segments, nodes, terminals,  
499 and dendritic tortuosity (Supplementary Table 3) showed neither cell type nor age-related  
500 differences. Similarly, SGCs, like GCs, have dendritic spines which can aid in distinguishing  
501 them from inhibitory neurons. Additionally, hilar axon collaterals of SGCs have “mossy fiber  
502 boutons” typically attributed to GCs (Supplementary Fig. 1 and Save et al. 2018). Notably, in  
503 pilot clustering analysis which included a few molecular layer inhibitory neurons, the  
504 interneurons clustered on a different branch of the dendrogram than SGCs and GCs (data not  
505 shown). The similarities between GCs and SGCs are not surprising, since we previously  
506 identified that SGCs express the Prospero homeobox protein 1 (Prox1) present in GCs indicating  
507 a shared lineage (Gupta et al. 2012). This shared lineage was confirmed by a recent study which  
508 identified a narrow developmental window of embryonic day 12-15 during which SGCs are  
509 produced from the same precursor niche as GCs (Save et al. 2018). Yet, the morphology of  
510 embryonically labeled SGCs were distinct from that of GCs labeled on the same day (Save et al.

511 2018), demonstrating that they are a distinct population of cells rather than a cohort of GCs with  
512 a different maturation state. In this context, studies examining dendritic properties of GCs with  
513 somata located in the outer third of the molecular layer have consistently reported wider  
514 dendritic fields and distinct dendritic arbors consistent with the possibility that the outer third of  
515 the granule cell layer may consist of a mixed population of GCs and SGCs (Green and Juraska  
516 1985; Kerloch et al. 2018; Sun et al. 2013). Whether specific genetic, molecular or  
517 developmental cues guide the development of SGCs during neurogenesis or whether local  
518 molecular and spatial factors in the dentate GCL-molecular layer border contribute to elaboration  
519 of distinct dendritic arbors remains to be determined (Hatami et al. 2018; Lefebvre et al. 2015).  
520 Although the mechanisms underlying specification of SGCs as a distinct population needs  
521 further investigation, our objective unsupervised morphometric analysis identifies the key  
522 somato-dendritic structural features that distinguish SGCs from GCs through postnatal  
523 development.

524 A defining feature of the dentate gyrus is the presence of heavy inhibitory regulation (Coulter  
525 and Carlson 2007). Dentate GCs receive synaptic inhibition from a diverse population of neurons  
526 and are also under steady-state, tonic extrasynaptic inhibition (Coulter and Carlson 2007; Ewell  
527 and Jones 2010; Harney and Jones 2002; Stell et al. 2003). In an earlier study, we identified that  
528 SGCs are under stronger inhibitory regulation than GCs with higher frequency of inhibitory  
529 synaptic currents and greater amplitude of tonic GABA currents (Gupta et al. 2012). Here, we  
530 find that SGCs continue to receive greater spontaneous synaptic inhibitory events than GCs  
531 through postnatal development. This contrasts with the lack of difference in inhibitory current  
532 between embryonically-born and adult-born mature granule cells (Laplagne et al. 2007).  
533 Interestingly, while the frequency of sIPSCs peaked during adolescence in both cell types, the

534 amplitude decreases progressively with development. Additionally, while synaptic membrane  
535 kinetics decreased with development in GCs, they increased with development of SGCs. The  
536 combined effect of cell specific and developmental changes resulted in an overall decrease in  
537 cumulative synaptic inhibitory charge transfer from infancy to adulthood while maintaining  
538 similar charge transfer between age-matched GCs and SGCs. In addition to developmental  
539 changes in  $\tau_{\text{membrane}}$  which could contribute to cell-specific regulation of synaptic kinetics, the  
540 roles of changes in GABA receptor subunits, dendritic pruning and synaptic distribution need to  
541 be considered in future works. Although lower  $R_{\text{in}}$  in SGCs has been considered a defining  
542 distinction from GCs (Erwin et al. 2020; Gupta et al. 2012; Williams et al. 2007), our  
543 demonstration that SGCs in adult rats have higher  $R_{\text{in}}$  than in GCs suggests that  $R_{\text{in}}$  may not be  
544 an age-invariant feature for cell classification.

545 Can dendritic structural features explain the cell-type specific and developmental differences in  
546 sIPSC frequency in dentate projection neurons? The consistently higher sIPSC frequency in  
547 SGCs is surprising as the dendritic lengths and location are not different between GCs and SGCs  
548 (Fig. 3). The wider dendritic distribution of SGCs, also reflected in the greater convex hull 3D  
549 volume, could allow for inputs from a larger group of inhibitory neurons to impinge on SGC  
550 dendrites, while GCs with their compact dendritic distribution may receive fewer inputs. It is  
551 also possible that the relatively early embryonic development of SGCs increases the chance of  
552 SGCs to receive more synaptic inputs compared to GCs which develop later into adulthood.  
553 However, since both dendritic length and convex hull 3D volume increase with postnatal  
554 development of both cells, changes in dendritic morphology and embryonic development are  
555 unlikely to account for the peak in sIPSC frequency in adolescence followed by decline in adults.  
556 The possibility of developmental increase in synapses from infancy to adolescence followed by



557 pruning or synapse elimination into adulthood (Riccomagno and Kolodkin 2015; Tran et al.  
558 2009) may be considered in future works. The progressive decrease in sIPSC amplitude with  
559 development in both SGCs and GCs could reflect the increase in dendritic length with  
560 development. Consistent with this proposal, the proportion of large amplitude events decrease  
561 progressively with development in both cell types (Supplementary Figure 5).

562 In parallel, the amplitude of extrasynaptic GABA currents in SGCs peaked during adolescence.  
563 Similarly, tonic GABA currents in GCs showed a peak during adolescence confirming the  
564 developmental increase reported in previous studies (Holter et al. 2010). Increase in expression  
565 of the extrasynaptic GABA<sub>A</sub>R  $\delta$  subunit in both GCs and SGCs (Gupta et al. 2012; Maguire and  
566 Mody 2009) is likely to mediate the increase in tonic GABA currents from infancy to  
567 adolescence. Additionally, changes in synaptically released GABA accompanying changes in  
568 sIPSC frequency, reported here, could contribute to the peak in extrasynaptic GABA exhibited in  
569 adolescence. An interesting feature of tonic GABA currents mediated by GABA<sub>A</sub>R  $\delta$  subunit is  
570 their robust enhancement by neurosteroids, raising the possibility that increases in ambient  
571 neurosteroids during adolescence (Harden and MacLusky 2004; Maguire and Mody 2009) could  
572 augment tonic GABA currents. Since tonic GABA currents mediated by GABA<sub>A</sub>R  $\delta$  subunits are  
573 exquisitely sensitive to ethanol (Mody et al. 2007), the greater magnitude of tonic GABA  
574 currents in SGCs during adolescence is likely to render SGCs vulnerable to ethanol modulation  
575 and impact their role in dentate processing. Indeed, behavioral deficits following alcohol  
576 administration have been shown to be particularly accentuated during adolescence (Lacaille et al.  
577 2015; Spanos et al. 2012). It would be important for future studies to ascertain how the  
578 differences in basal synaptic inhibition impact the recruitment and circuit function of SGCs and  
579 GCs during network activity and with development. Since basal inhibition in the dentate gyrus

580 regulates synaptic plasticity and pattern separation at the level of the circuit (Dengler and Coulter  
581 2016; Madar et al. 2019), and SGCs have been proposed to contribute to dentate pattern  
582 separation (Larimer and Strowbridge 2010), developmental changes in GC and SGC inhibition  
583 are likely to influence memory and cognitive performance.

584 Together, the structural and functional data identify SGCs as a cell type which differs from GCs  
585 in somato-dendritic structure and developmental plasticity of inhibitory inputs, extrasynaptic  
586 inhibition and membrane kinetics. Our data demonstrate that SGCs have heightened  
587 extrasynaptic inhibition during adolescence which would make them susceptible to endogenous  
588 and exogenous modulation of activity levels during adolescence. Notably, our results delineate  
589 salient structural features that enable anatomical identification of this subpopulation of dentate  
590 projection neurons. The novel data defining the structural features of SGCs will allow for future  
591 targeted analysis of their molecular profile and microcircuit connectivity to better understand  
592 their role in circuit function and behaviors. In conclusion, the fundamental characterization of  
593 SGCs presented here will support incorporation of SGCs into current models of the dentate gyrus  
594 and consideration of their role in dentate microcircuit processing in health and disease.

595

596 **Reference List**

- 597 Coulter DA, Carlson GC (2007) Functional regulation of the dentate gyrus by GABA-mediated  
598 inhibition ProgBrain Res 163:235-243
- 599 Dengler CG, Coulter DA (2016) Normal and epilepsy-associated pathologic function of the  
600 dentate gyrus Prog Brain Res 226:155-178 doi:10.1016/bs.pbr.2016.04.005
- 601 Dieni CV, Chancey JH, Overstreet-Wadiche LS (2012) Dynamic functions of GABA signaling  
602 during granule cell maturation Front Neural Circuits 6:113 doi:10.3389/fncir.2012.00113
- 603 DiScenna PG, Teyler TJ (1994) Development of inhibitory and excitatory synaptic transmission  
604 in the rat dentate gyrus Hippocampus 4:569-576 doi:10.1002/hipo.450040506
- 605 Duffy CJ, Rakic P (1983) Differentiation of granule cell dendrites in the dentate gyrus of the  
606 rhesus monkey: a quantitative Golgi study J Comp Neurol 214:224-237  
607 doi:10.1002/cne.902140210
- 608 Engel D, Jonas P (2005) Presynaptic action potential amplification by voltage-gated Na<sup>+</sup>  
609 channels in hippocampal mossy fiber boutons Neuron 45:405-417  
610 doi:10.1016/j.neuron.2004.12.048
- 611 Erwin SR, Sun W, Copeland M, Lindo S, Spruston N, Cembrowski MS (2020) A Sparse,  
612 Spatially Biased Subtype of Mature Granule Cell Dominates Recruitment in Hippocampal-  
613 Associated Behaviors Cell Rep 31:107551 doi:10.1016/j.celrep.2020.107551
- 614 Ewell LA, Jones MV (2010) Frequency-tuned distribution of inhibition in the dentate gyrus The  
615 Journal of neuroscience : the official journal of the Society for Neuroscience 30:12597-12607  
616 doi:10.1523/JNEUROSCI.1854-10.2010

- 617 Freiman TM, Eismann-Schweimler J, Frotscher M (2011) Granule cell dispersion in temporal  
618 lobe epilepsy is associated with changes in dendritic orientation and spine distribution *Exp*  
619 *Neurol* 229:332-338 doi:10.1016/j.expneurol.2011.02.017
- 620 Green EJ, Juraska JM (1985) The dendritic morphology of hippocampal dentate granule cells  
621 varies with their position in the granule cell layer: a quantitative Golgi study *Exp Brain Res*  
622 59:582-586
- 623 Gupta A, Elgammal FS, Proddatur A, Shah S, Santhakumar V (2012) Decrease in tonic  
624 inhibition contributes to increase in dentate semilunar granule cell excitability after brain injury *J*  
625 *Neurosci* 32:2523-2537 doi:10.1523/JNEUROSCI.4141-11.2012
- 626 Harden C, MacLusky NJ (2004) Aromatase inhibition, testosterone, and seizures *Epilepsy Behav*  
627 5:260-263 doi:10.1016/j.yebeh.2003.12.001
- 628 Harney SC, Jones MV (2002) Pre- and postsynaptic properties of somatic and dendritic  
629 inhibition in dentate gyrus *Neuropharmacology* 43:584-594
- 630 Hatami M, Conrad S, Naghsh P, Alvarez-Bolado G, Skutella T (2018) Cell-Biological  
631 Requirements for the Generation of Dentate Gyrus Granule Neurons *Front Cell Neurosci* 12:402  
632 doi:10.3389/fncel.2018.00402
- 633 Hollrigel GS, Ross ST, Soltesz I (1998) Temporal patterns and depolarizing actions of  
634 spontaneous GABAA receptor activation in granule cells of the early postnatal dentate gyrus *J*  
635 *Neurophysiol* 80:2340-2351 doi:10.1152/jn.1998.80.5.2340
- 636 Holter NI, Zylla MM, Zuber N, Bruehl C, Draguhn A (2010) Tonic GABAergic control of  
637 mouse dentate granule cells during postnatal development *Eur J Neurosci* 32:1300-1309  
638 doi:10.1111/j.1460-9568.2010.07331.x

- 639 Husson F, Josse J, Pages J (2010) Principal component methods - hierarchical clustering -  
640 partitional clustering: why would we need to choose for visualizing data?
- 641 Jedlicka P, Deller T, Schwarzacher SW (2010) Computational modeling of GABAA receptor-  
642 mediated paired-pulse inhibition in the dentate gyrus *J Comput Neurosci* 29:509-519  
643 doi:10.1007/s10827-010-0214-y
- 644 Jedlicka P et al. (2011) Increased dentate gyrus excitability in neuroligin-2-deficient mice in vivo  
645 *Cereb Cortex* 21:357-367 doi:10.1093/cercor/bhq100
- 646 Kerloch T, Clavreul S, Goron A, Abrous DN, Pacary E (2018) Dentate Granule Neurons  
647 Generated During Perinatal Life Display Distinct Morphological Features Compared With Later-  
648 Born Neurons in the Mouse Hippocampus *Cereb Cortex* doi:10.1093/cercor/bhy224
- 649 Kesner RP (2018) An analysis of dentate gyrus function (an update) *Behav Brain Res* 354:84-91  
650 doi:10.1016/j.bbr.2017.07.033
- 651 Lacaille H, Duterte-Boucher D, Liot D, Vaudry H, Naassila M, Vaudry D (2015) Comparison of  
652 the deleterious effects of binge drinking-like alcohol exposure in adolescent and adult mice *J*  
653 *Neurochem* 132:629-641 doi:10.1111/jnc.13020
- 654 Laplagne DA, Kamienkowski JE, Esposito MS, Piatti VC, Zhao C, Gage FH, Schinder AF  
655 (2007) Similar GABAergic inputs in dentate granule cells born during embryonic and adult  
656 neurogenesis *Eur J Neurosci* 25:2973-2981 doi:10.1111/j.1460-9568.2007.05549.x
- 657 Larimer P, Strowbridge BW (2010) Representing information in cell assemblies: persistent  
658 activity mediated by semilunar granule cells *Nat Neurosci* 13:213-222 doi:10.1038/nn.2458
- 659 Lee CY, Liou HH (2013) GABAergic tonic inhibition is regulated by developmental age and  
660 epilepsy in the dentate gyrus *Neuroreport* 24:515-519 doi:10.1097/WNR.0b013e32836205bc

- 661 Lefebvre JL, Sanes JR, Kay JN (2015) Development of dendritic form and function *Annu Rev*  
662 *Cell Dev Biol* 31:741-777 doi:10.1146/annurev-cellbio-100913-013020
- 663 Li L, Gervasi N, Girault JA (2015) Dendritic geometry shapes neuronal cAMP signalling to the  
664 nucleus *Nat Commun* 6:6319 doi:10.1038/ncomms7319
- 665 Li Y, Aimone JB, Xu X, Callaway EM, Gage FH (2012) Development of GABAergic inputs  
666 controls the contribution of maturing neurons to the adult hippocampal network *Proc Natl Acad*  
667 *Sci U S A* 109:4290-4295 doi:10.1073/pnas.1120754109
- 668 Llorens-Martin M, Rabano A, Avila J (2015) The Ever-Changing Morphology of Hippocampal  
669 Granule Neurons in Physiology and Pathology *Front Neurosci* 9:526  
670 doi:10.3389/fnins.2015.00526
- 671 Madar AD, Ewell LA, Jones MV (2019) Temporal pattern separation in hippocampal neurons  
672 through multiplexed neural codes *PLoS Comput Biol* 15:e1006932  
673 doi:10.1371/journal.pcbi.1006932
- 674 Maguire J, Mody I (2009) Steroid hormone fluctuations and GABA(A)R plasticity  
675 *Psychoneuroendocrinology* 34 Suppl 1:S84-90 doi:10.1016/j.psyneuen.2009.06.019
- 676 Mody I, Glykys J, Wei W (2007) A new meaning for "Gin & Tonic": tonic inhibition as the  
677 target for ethanol action in the brain *Alcohol* 41:145-153 doi:10.1016/j.alcohol.2007.03.009
- 678 Neuberger EJ, Swietek B, Corrubia L, Prasanna A, Santhakumar V (2017) Enhanced Dentate  
679 Neurogenesis after Brain Injury Undermines Long-Term Neurogenic Potential and Promotes  
680 Seizure Susceptibility *Stem Cell Reports* 9:972-984 doi:10.1016/j.stemcr.2017.07.015
- 681 Overstreet-Wadiche LS, Westbrook GL (2006) Functional maturation of adult-generated granule  
682 cells *Hippocampus* 16:208-215 doi:10.1002/hipo.20152

683 Pilli J, Abbasi S, Richardson M, Kumar SS (2012) Diversity and excitability of deep-layer  
684 entorhinal cortical neurons in a model of temporal lobe epilepsy *J Neurophysiol* 108:1724-1738  
685 doi:10.1152/jn.00364.2012

686 Ramón y Cajal S (1953) *Histologie du système nerveux de l'homme & des vertébrés*. Éd.  
687 française rev. & mise à jour edn. Consejo Superior de Investigaciones Científicas, Instituto  
688 Ramón y Cajal, Madrid,

689 Redila VA, Christie BR (2006) Exercise-induced changes in dendritic structure and complexity  
690 in the adult hippocampal dentate gyrus *Neuroscience* 137:1299-1307  
691 doi:10.1016/j.neuroscience.2005.10.050

692 Riccomagno MM, Kolodkin AL (2015) Sculpting neural circuits by axon and dendrite pruning  
693 *Annu Rev Cell Dev Biol* 31:779-805 doi:10.1146/annurev-cellbio-100913-013038

694 Sancho-Bielsa FJ, Navarro-Lopez JD, Alonso-Llosa G, Molowny A, Ponsoda X, Yajeya J,  
695 Lopez-Garcia C (2012) Neurons of the dentate molecular layer in the rabbit hippocampus *PLoS*  
696 *One* 7:e48470 doi:10.1371/journal.pone.0048470

697 Save L, Baude A, Cossart R (2018) Temporal Embryonic Origin Critically Determines Cellular  
698 Physiology in the Dentate Gyrus Cereb Cortex doi:10.1093/cercor/bhy132

699 Semple BD, Blomgren K, Gimlin K, Ferriero DM, Noble-Haeusslein LJ (2013) Brain  
700 development in rodents and humans: Identifying benchmarks of maturation and vulnerability to  
701 injury across species *Prog Neurobiol* 106-107:1-16 doi:10.1016/j.pneurobio.2013.04.001

702 Sengupta P (2013) The Laboratory Rat: Relating Its Age With Human's *Int J Prev Med* 4:624-  
703 630

704 Seress L, Frotscher M (1990) Morphological variability is a characteristic feature of granule cells  
705 in the primate fascia dentata: a combined Golgi/electron microscope study *J Comp Neurol*  
706 293:253-267

707 Soltesz I, Losonczy A (2018) CA1 pyramidal cell diversity enabling parallel information  
708 processing in the hippocampus *Nat Neurosci* 21:484-493 doi:10.1038/s41593-018-0118-0

709 Soltesz I, Smetters DK, Mody I (1995) Tonic inhibition originates from synapses close to the  
710 soma *Neuron* 14:1273-1283

711 Spanos M, Besheer J, Hodge CW (2012) Increased sensitivity to alcohol induced changes in  
712 ERK Map kinase phosphorylation and memory disruption in adolescent as compared to adult  
713 C57BL/6J mice *Behav Brain Res* 230:158-166 doi:10.1016/j.bbr.2012.02.010

714 Stell BM, Brickley SG, Tang CY, Farrant M, Mody I (2003) Neuroactive steroids reduce  
715 neuronal excitability by selectively enhancing tonic inhibition mediated by delta subunit-  
716 containing GABAA receptors *Proc Natl Acad Sci U S A* 100:14439-14444  
717 doi:10.1073/pnas.2435457100

718 Sun GJ, Sailor KA, Mahmood QA, Chavali N, Christian KM, Song H, Ming GL (2013)  
719 Seamless reconstruction of intact adult-born neurons by serial end-block imaging reveals  
720 complex axonal guidance and development in the adult hippocampus *J Neurosci* 33:11400-  
721 11411 doi:10.1523/JNEUROSCI.1374-13.2013

722 Swietek B, Gupta A, Proddutur A, Santhakumar V (2016) Immunostaining of Biocytin-filled and  
723 Processed Sections for Neurochemical Markers *J Vis Exp* doi:10.3791/54880

724 Thind KK, Ribak CE, Buckmaster PS (2008) Synaptic input to dentate granule cell basal  
725 dendrites in a rat model of temporal lobe epilepsy *J Comp Neurol* 509:190-202  
726 doi:10.1002/cne.21745



- 727 Toda T, Gage FH (2018) Review: adult neurogenesis contributes to hippocampal plasticity *Cell*  
728 *Tissue Res* 373:693-709 doi:10.1007/s00441-017-2735-4
- 729 Tran TS et al. (2009) Secreted semaphorins control spine distribution and morphogenesis in the  
730 postnatal CNS *Nature* 462:1065-1069 doi:10.1038/nature08628
- 731 van der Velden L, van Hooft JA, Chameau P (2012) Altered dendritic complexity affects firing  
732 properties of cortical layer 2/3 pyramidal neurons in mice lacking the 5-HT3A receptor *J*  
733 *Neurophysiol* 108:1521-1528 doi:10.1152/jn.00829.2011
- 734 van Elburg RA, van Ooyen A (2010) Impact of dendritic size and dendritic topology on burst  
735 firing in pyramidal cells *PLoS Comput Biol* 6:e1000781 doi:10.1371/journal.pcbi.1000781
- 736 Villasana LE, Kim KN, Westbrook GL, Schnell E (2015) Functional Integration of Adult-Born  
737 Hippocampal Neurons after Traumatic Brain Injury(1,2,3) *eNeuro* 2  
738 doi:10.1523/ENEURO.0056-15.2015
- 739 von Campe G, Spencer DD, de Lanerolle NC (1997) Morphology of dentate granule cells in the  
740 human epileptogenic hippocampus *Hippocampus* 7:472-488 doi:10.1002/(SICI)1098-  
741 1063(1997)7:5<472::AID-HIPO4>3.0.CO;2-J
- 742 Walker MC, Pavlov I, Kullmann DM (2010) A 'sustain pedal' in the hippocampus? *Nature*  
743 *neuroscience* 13:146-148 doi:10.1038/nn0210-146
- 744 Williams PA, Larimer P, Gao Y, Strowbridge BW (2007) Semilunar granule cells: glutamatergic  
745 neurons in the rat dentate gyrus with axon collaterals in the inner molecular layer *J Neurosci*  
746 27:13756-13761 doi:10.1523/JNEUROSCI.4053-07.2007
- 747 Yu EP, Dengler CG, Frausto SF, Putt ME, Yue C, Takano H, Coulter DA (2013a) Protracted  
748 postnatal development of sparse, specific dentate granule cell activation in the mouse  
749 hippocampus *J Neurosci* 33:2947-2960 doi:10.1523/JNEUROSCI.1868-12.2013

750 Yu J, Proddatur A, Elgammal FS, Ito T, Santhakumar V (2013b) Status epilepticus enhances  
751 tonic GABA currents and depolarizes GABA reversal potential in dentate fast-spiking basket  
752 cells J Neurophysiol 109:1746-1763 doi:10.1152/jn.00891.2012  
753 Yu J, Proddatur A, Swietek B, Elgammal FS, Santhakumar V (2016) Functional Reduction in  
754 Cannabinoid-Sensitive Heterotypic Inhibition of Dentate Basket Cells in Epilepsy: Impact on  
755 Network Rhythms Cereb Cortex 26:4229-4314 doi:10.1093/cercor/bhv199  
756

757 **Figure Legends**

758 **Figure 1. Somato-dendritic differences in dentate projection neurons - GCs and SGCs.**

759 Representative neuronal reconstructions of GC (1A-F) and SGC (1G-L) showing distinct  
760 dendritic arbors from infant (top), adolescent (middle) and adult (bottom) age groups. Note that  
761 images are shown in different planes for each age group. The complexity of dendrites is shown  
762 in XY planes for GCs and SGCs 'A, B, C' and 'G, H, I' respectively and perpendicular view is  
763 shown in 'D, E, F' for GCs and 'J, K, L' for SGCs. Inset images in the center represent the color  
764 coding for dendritic segments from proximal to distal axes. Scale bar: 100 $\mu$ m.

765 **Figure 2. Hierarchical clustering on principal component reveals two major clusters of**

766 **dentate projection neurons.** (A-B) 3D representation of the principal component analysis of  
767 individuals resolved by first three principal components, with confidence interval (CI) ellipsoid  
768 set to 0.95. The plot suggests grouping by cell type (A) but not by age (B). (C) Hierarchical  
769 clustering on Principal Components based on 42 morphometric parameters (Supplementary  
770 Tables 1 & 2) was performed using Ward's method with Euclidean distance to generate the  
771 dendrogram. Dendrogram classifies neurons into two putative clusters. Cells in which the  
772 classifier and experimenter failed to concur on classification are represented by green  
773 arrowheads based on investigator assigned classification.

774 **Figure 3: Comparison of morphometric parameters between GCs and SGCs at distinct**

775 **developmental stages.** Summary plots of averages no. of primary dendrites (A), soma width (B),  
776 dendritic angle (C), total dendritic length (D), dendritic complexity (E), and convex hull surface  
777 area (F) of GCs and SGCs at three developmental time points. \*, #, and \$ denote  $p < 0.05$  for

778 differences between cell types, in GC across age groups and SGC across age groups, respectively  
779 by TW-ANOVA followed by post-hoc pairwise comparison (Supplementary Tables 3 & 4).

780 N= GCs, 6 infant, 6 adolescent and 4 adult and SGCs, 9 infant, 5 adolescent and 6 adult.

781

782 **Figure 4: Developmental differences in sIPSC frequencies of GCs and SGCs.** Representative  
783 sIPSC traces in GCs (left, A1, B1, C1) and SGCs (right, A2, B2, C2) in infant, adolescent, and  
784 adult age groups. Summary plot of developmental differences in sIPSC frequency between and  
785 within GCs and SGCs (D). \*, #, and \$ denote  $p < 0.05$  for differences between cell types, in GC  
786 across age groups and SGC across age groups, respectively by TW-ANOVA followed by post-  
787 hoc pairwise comparison (Supplementary Tables 5 & 6). Cumulative probability plots of sIPSCs  
788 frequency show differences between cell types at infant (E1), adolescent (E2) and adult (E3) age  
789 groups \* denotes  $p < 0.05$  for differences between cell types by Kruskal-Wallis Test  
790 (Supplementary Tables 5 & 6).

791 **Figure 5: Developmental changes in average sIPSC parameters in GCs and SGCs.** Overlay  
792 of representative average sIPSC waveforms from GCs (A) and SGCs (B) in different age  
793 groups. Summary plots of sIPSC amplitude (C), weighted  $\tau_{\text{decay}}$  (D), 20-80 rise time (E), and  
794 charge transfer (F) at three developmental stages in both cell types. \*, #, and \$ denote  $p < 0.05$  for  
795 differences between cell types, in GC across age groups and SGC across age groups, respectively  
796 by TW-ANOVA followed by post-hoc pairwise comparison (Supplementary Tables 5 - 8).

797 **Figure 6: Extrasynaptic tonic GABAergic currents in SGCs peak during adolescence.**  
798 Representative baseline current recordings in GCs (left, A1-3) and SGCs (right, B1-3) in infant,  
799 adolescent and adult age groups. Tonic GABA current is measured as the difference in baseline

800 current upon perfusion of the GABA receptor antagonist BMI (100 $\mu$ M). Gaussian fit to the  
801 positive half of the baseline current, under basal conditions and in BMI, is illustrated on the right  
802 of each trace and was used to quantify tonic GABA. (C) Summary plot showing average tonic  
803 GABAergic currents at three distinct time points. \*, #, and \$ denote  $p < 0.05$  for differences  
804 between cell types, in GCs across age groups and in SGCs across age groups, respectively by  
805 TW-ANOVA followed by post-hoc pairwise comparison (Supplementary Tables 5 & 6).

806

807 **Figure 7: Paired pulse inhibition as a measure of local feedback inhibition.** (A) Shows  
808 representative traces showing paired pulse inhibition among infant, adolescent, and adult groups  
809 in response to activation of medial Perforant path (mPP) in anesthetized rats. Note the difference  
810 in y scale bars. (B) Box plot showing the distribution of paired pulse ratio's between the groups  
811 (infant vs. adolescent  $p < 0.001$ ; adolescent vs. adults  $p = 0.007$ ; infants vs. adults  $p = 0.068$  : \*  
812 indicates  $p < 0.05$  by One-way ANOVA followed by pairwise comparison by Post-hoc Holm-  
813 Sidak method.

814

815

816 **Supplementary Figure legends**

817 **Supplementary Figure 1: Representative images of a GC and SGC.** Images of a typical GC

818 (A) and SGC (B) illustrate the somatic location, dendritic arbor, with high density of spines

819 (insets, white arrows) and axons with boutons (white arrow heads) targeting CA3 used by

820 experimenter to classify SGCs and GCs. Scale bar: 100 $\mu$ m; Inset scale bar: 20  $\mu$ m.

821 **Supplementary Figure 2: Analysis of Morphological Variables underlying Principal**

822 **Components. A.** Histogram illustrates percentage of information retained by each dimension

823 (principal component, PC). B. Factor maps illustrate the quality of representation of the

824 morphometric variables measured by  $\cos^2$  (square cosine, squared coordinates). The darker color

825 indicates stronger contribution to variability to PC. C. Representation of the top five variables in

826 the first two dimensions. D. Neuronal reconstructions of SGC in first cluster (notice higher

827 complexity than other SGCs in figure 1). Scale bar: 100 $\mu$ m.

828 **Supplementary Figure 3: Comparison of morphometric parameters between GCs and**

829 **SGCs at distinct developmental stages.** Summary plot of number of second (A) and third (B)

830 order dendritic segments, second order nodes (C), total number of dendritic ends (D), total

831 dendritic nodes (E) and total dendritic segments (F) in GCs and SGCs at the three age groups

832 examined. \* denotes  $p < 0.05$  for differences between cell types by TW-ANOVA followed by

833 post-hoc pairwise comparison (Supplementary Tables 3 & 4). N= GCs, 6 infant, 6 adolescent and

834 4 adult and SGCs, 9 infant, 5 adolescent and 6 adult.

835

836 **Supplementary Figure 4: Cumulative plots of sIPSC frequency in GCs and SGCs through**  
837 **development.** Cumulative plots of sIPSC frequency comparing three age groups \* denotes  
838  $p < 0.05$  for differences between cell types by Kruskal-Wallis Test (Supplementary Table 6) in  
839 GCs (A) and SGCs (B). Summary plot of cumulative charge transfer over one second (C) at  
840 three developmental stages in both cell types. #, and \$ denote  $p < 0.05$  for differences in GC  
841 across age groups and SGC across age groups, respectively by TW-ANOVA followed by post-  
842 hoc pairwise comparison.

843 **Supplementary Figure 5: Developmental differences in distribution of sIPSC amplitudes in**  
844 **GCs and SGCs.** Pie chart distributions illustrating subjective percentage distribution of high  
845 peak amplitude ( $>50$  pA) and smaller peak amplitude ( $<50$  pA) amplitude sIPSCs in GCs (top)  
846 and SGCs (bottom) across age groups.

847 **Supplementary Figure 6: Analysis of developmental changes in passive membrane**  
848 **properties of GCs and SGCs.** Representative voltage traces in response to a  $-200$  pA current  
849 injection for one second in GCs and SGCs at the developmental stages under investigation  
850 reveal differences in  $R_{in}$  (A). Summary of  $R_{in}$  in the cell types (B). Summary plot of membrane  
851 time constant ( $\tau_{membrane}$ ) obtained from single exponential fits to the voltage response to  $-200$  pA  
852 current injection (C). \*, #, and \$ denote  $p < 0.05$  for differences between cell types, in GC across  
853 age groups and SGC across age groups, respectively by TW-ANOVA followed by post-hoc  
854 pairwise comparison (Supplementary Table 8).

855

856

## GC

INFANT

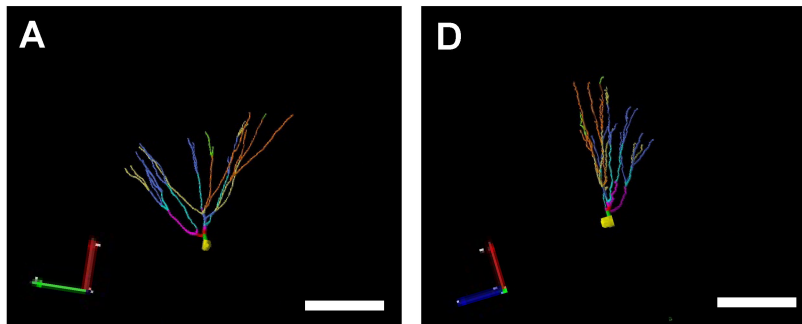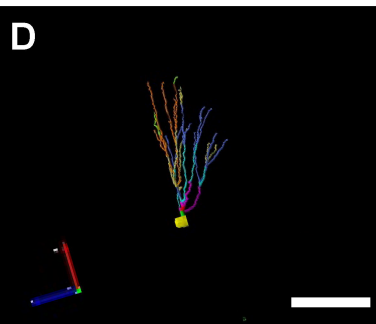

ADOLESCENT

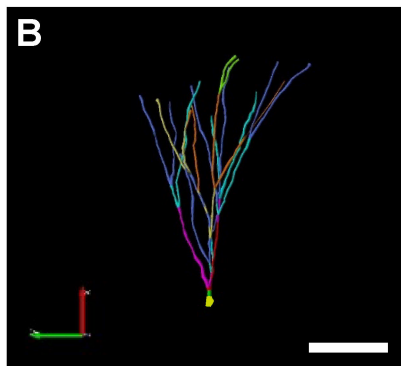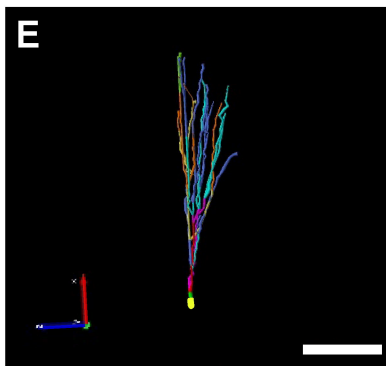

ADULT

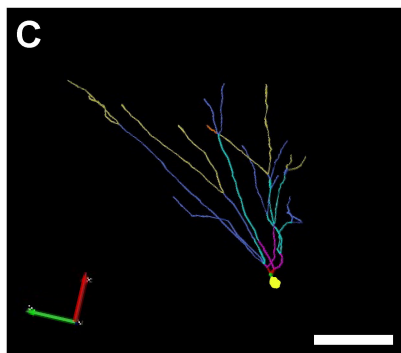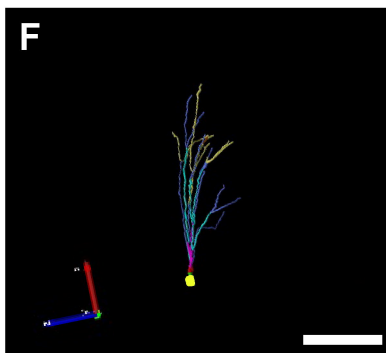Dendritic  
branch  
order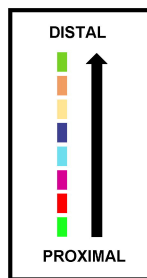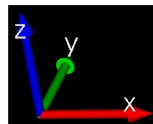

## SGC

INFANT

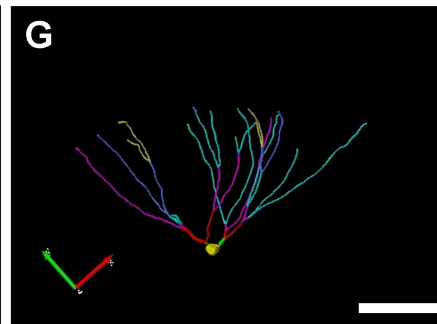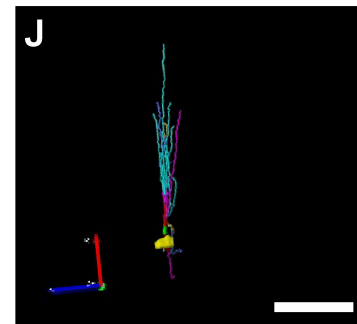

ADOLESCENT

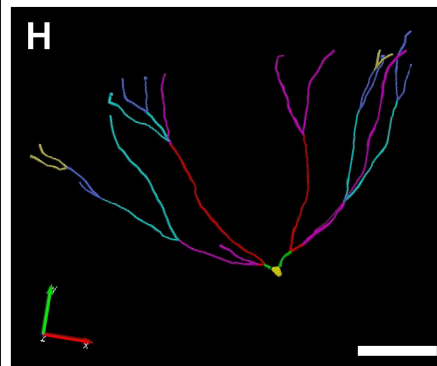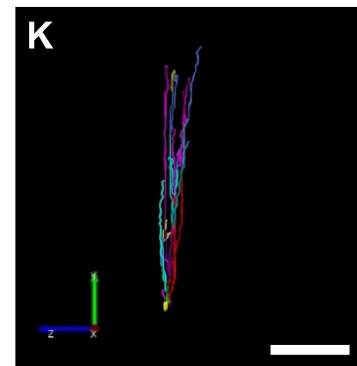

ADULT

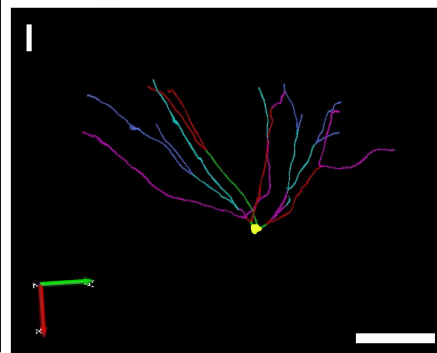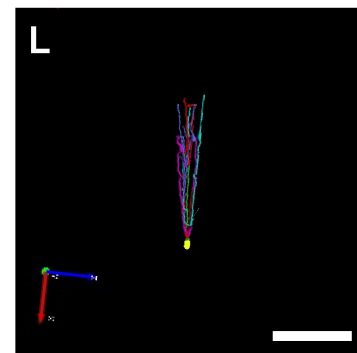



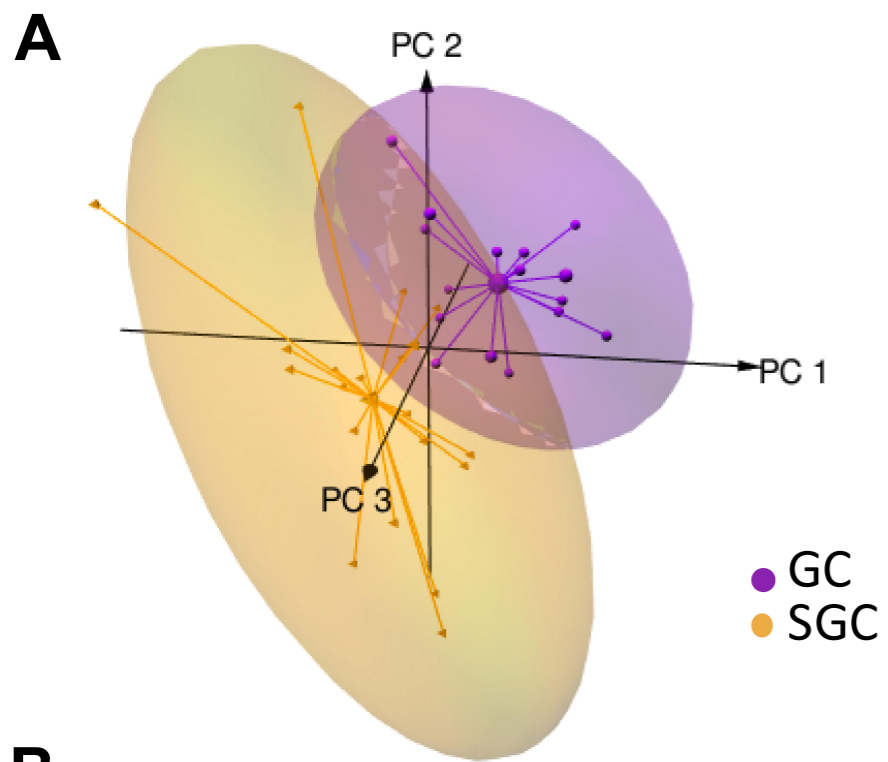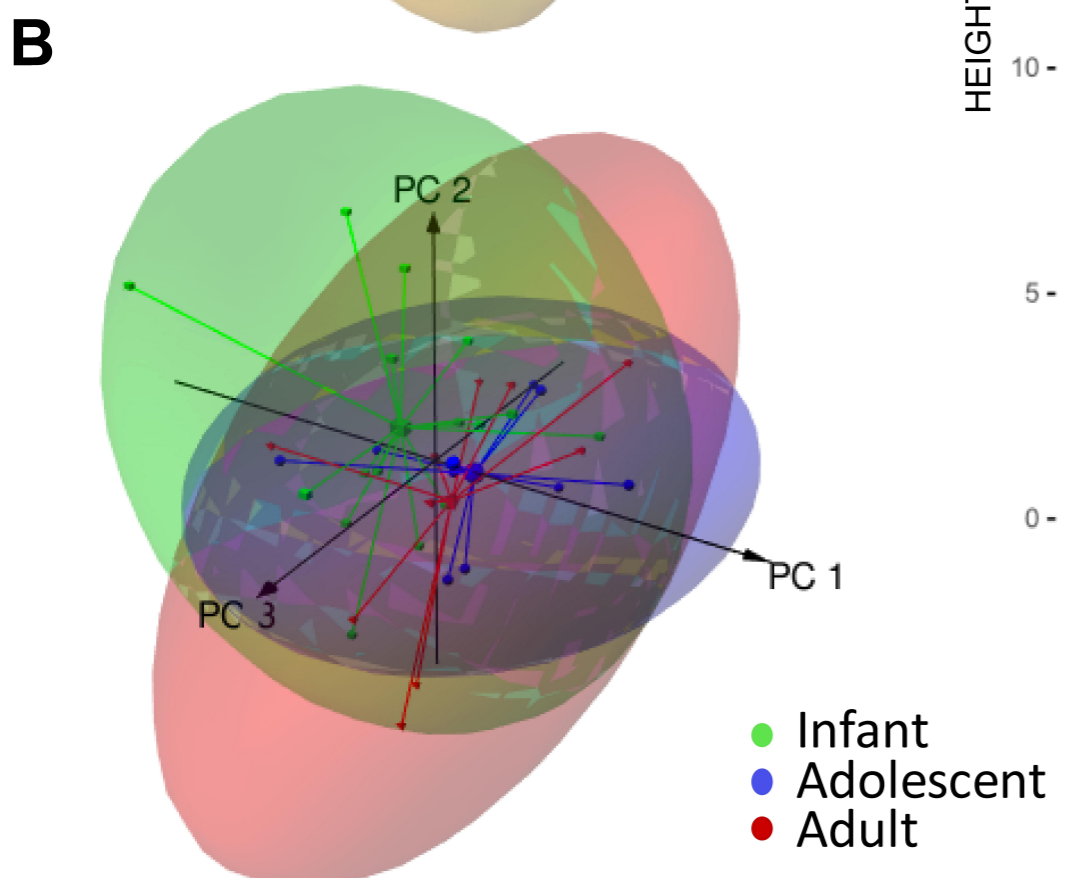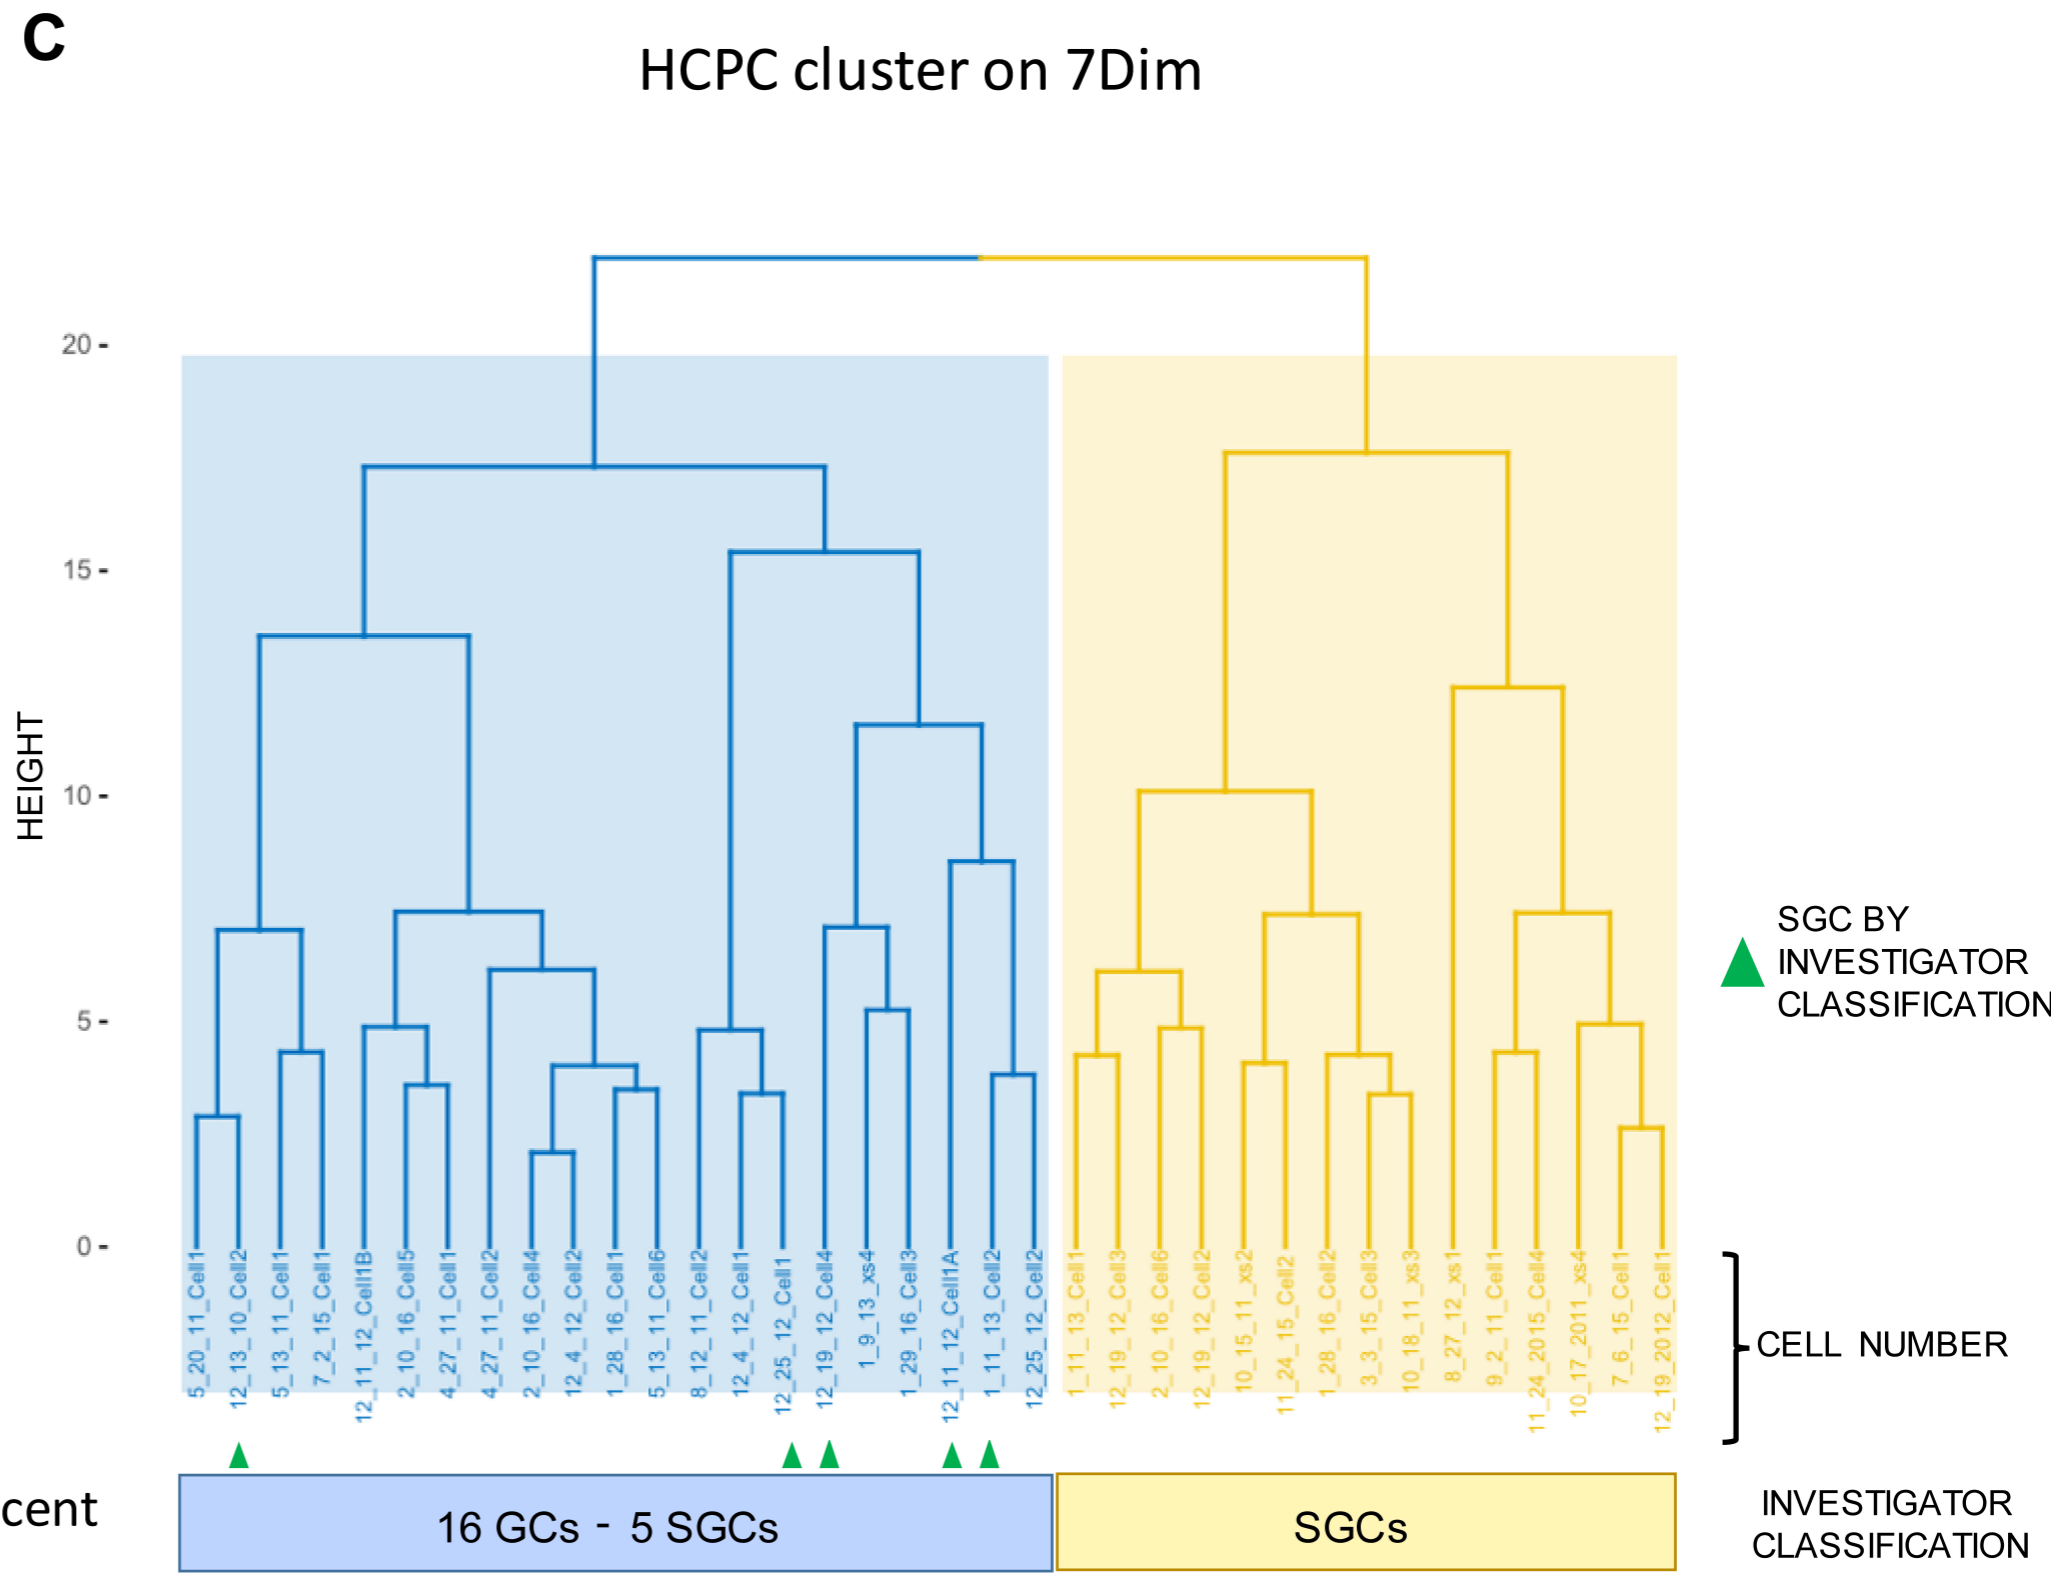

# Figure 3

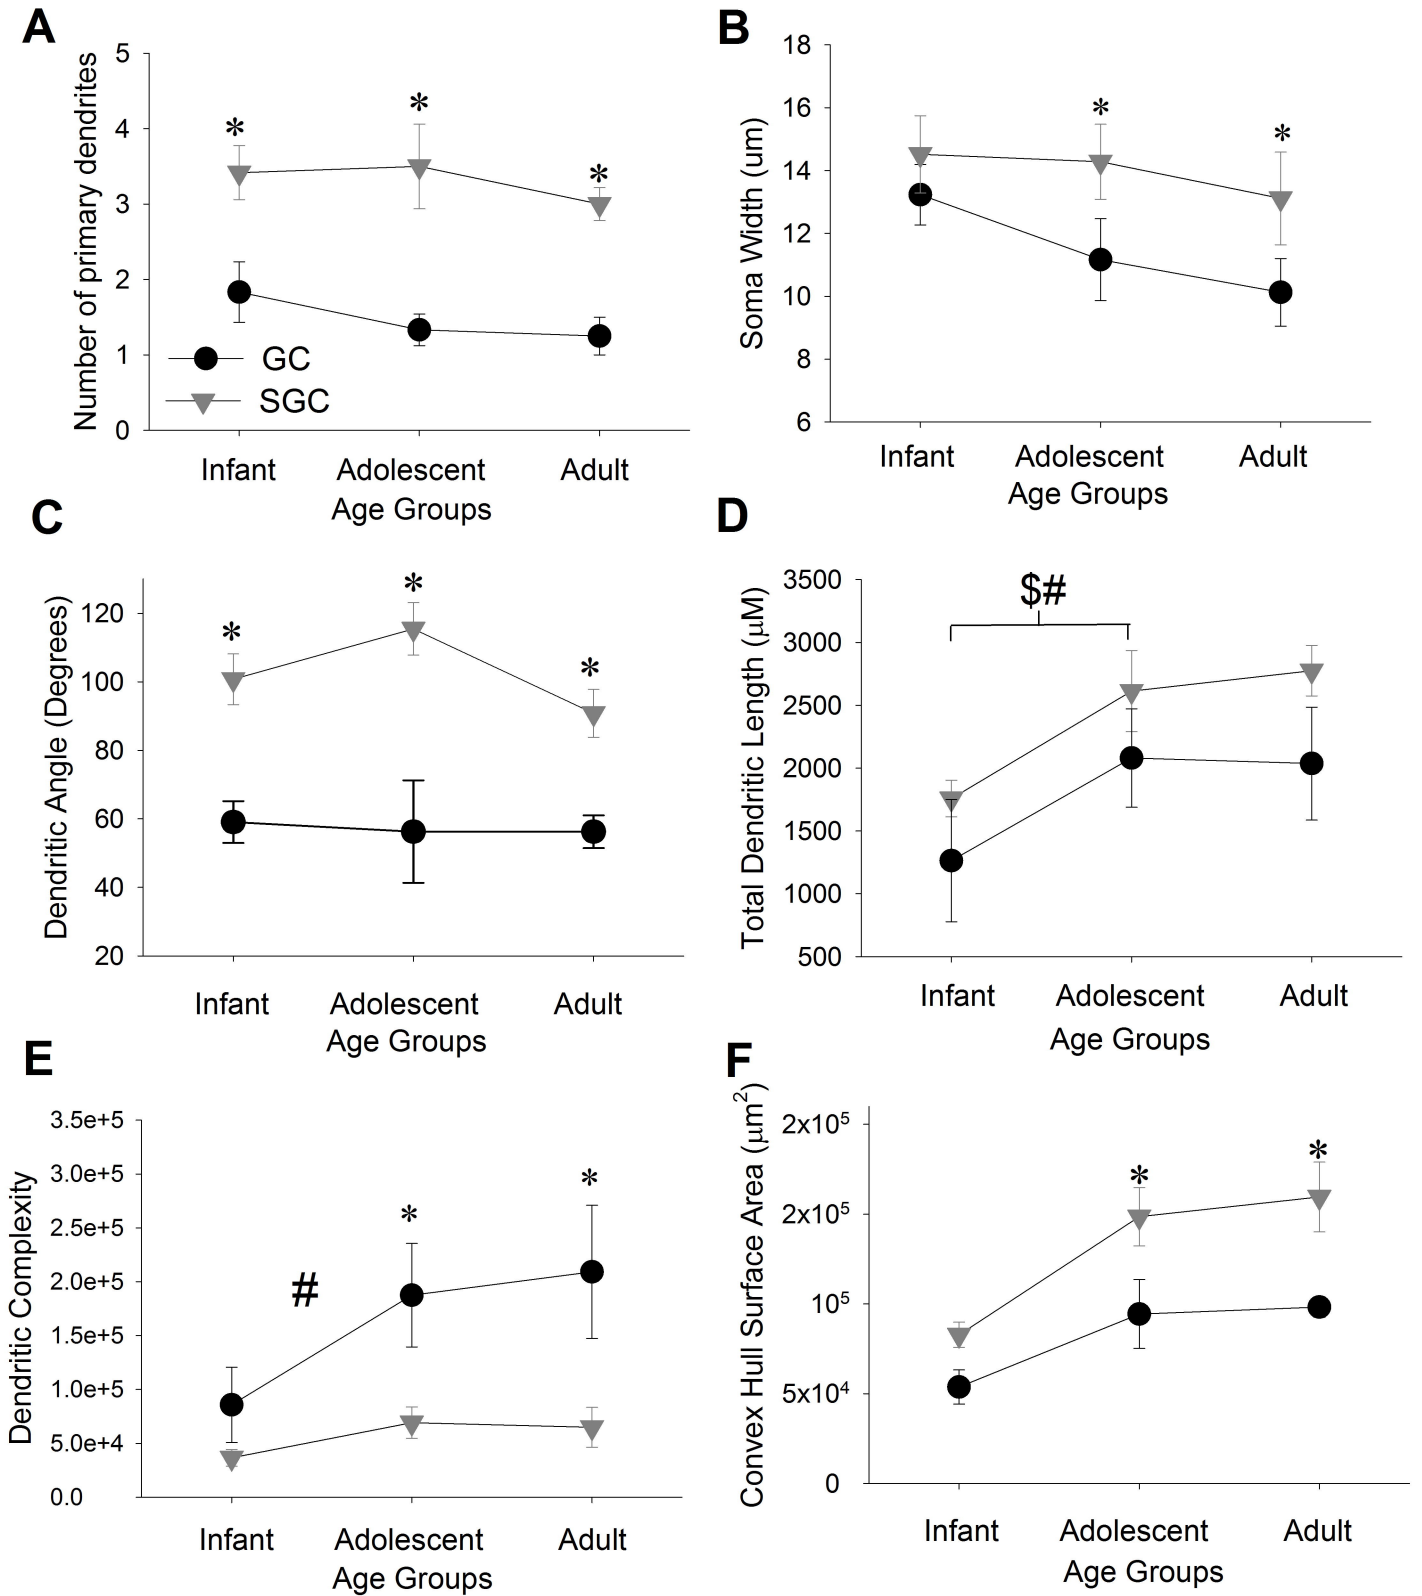

Figure 4

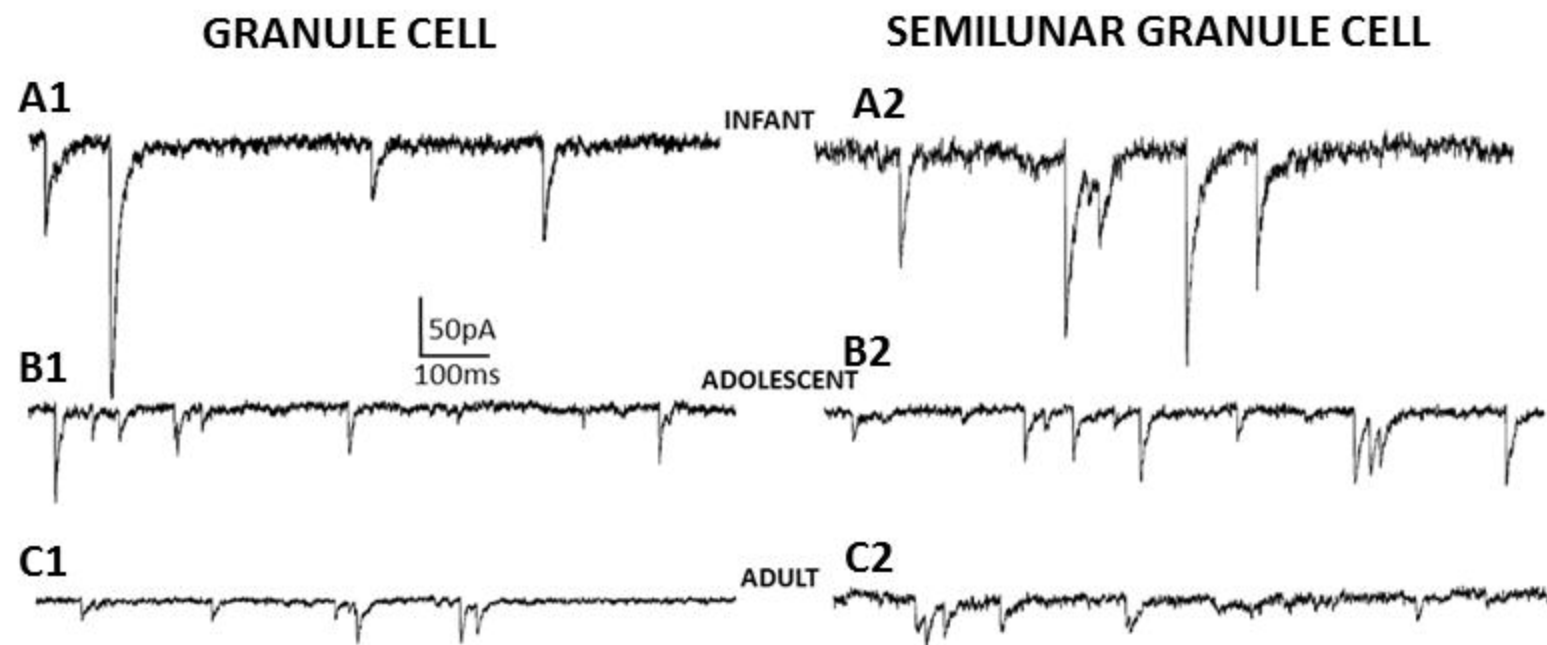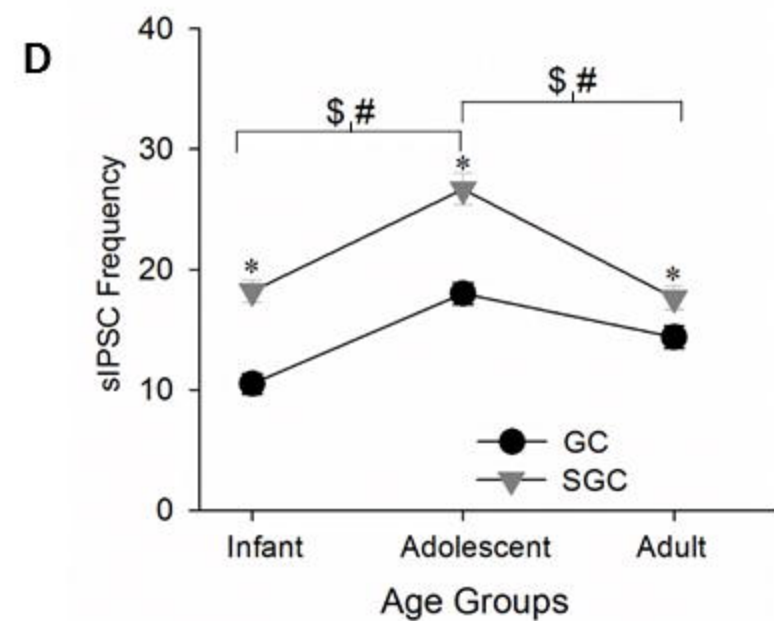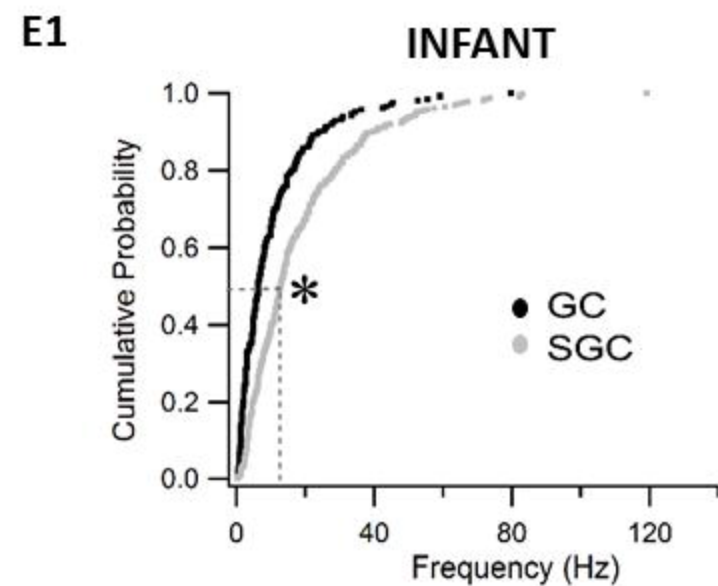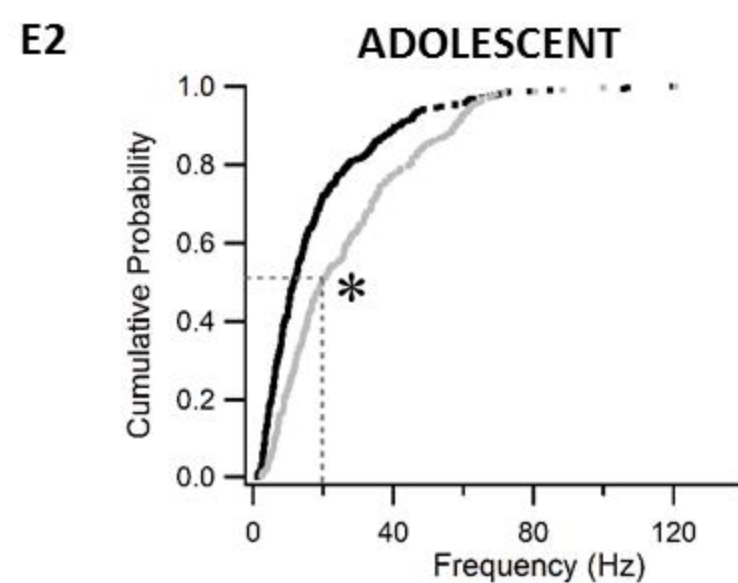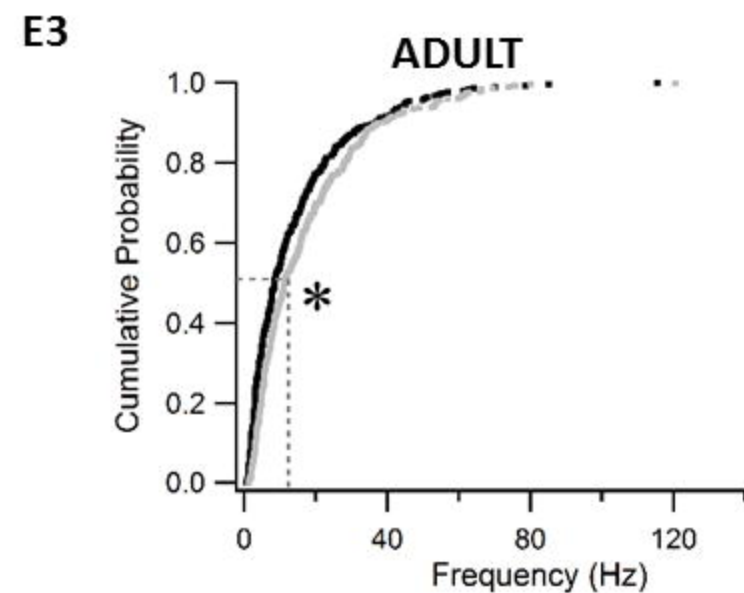

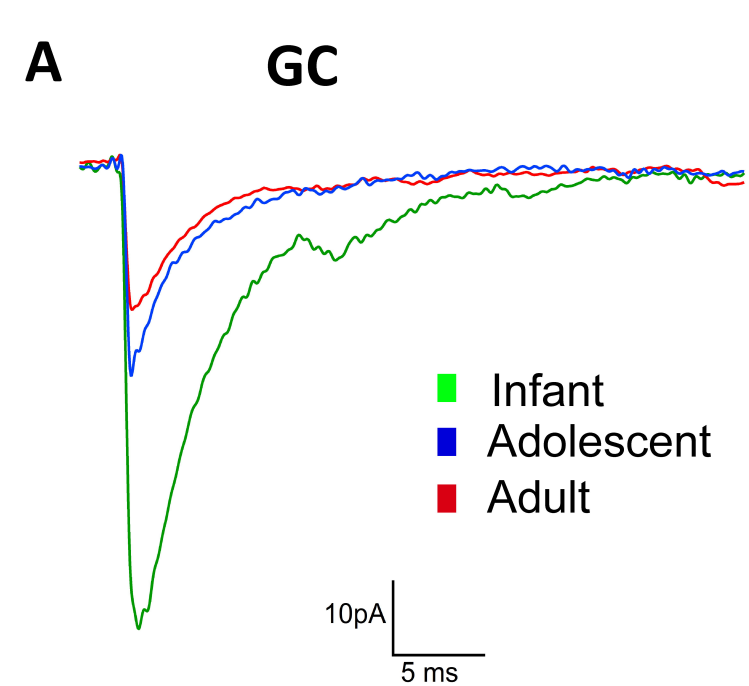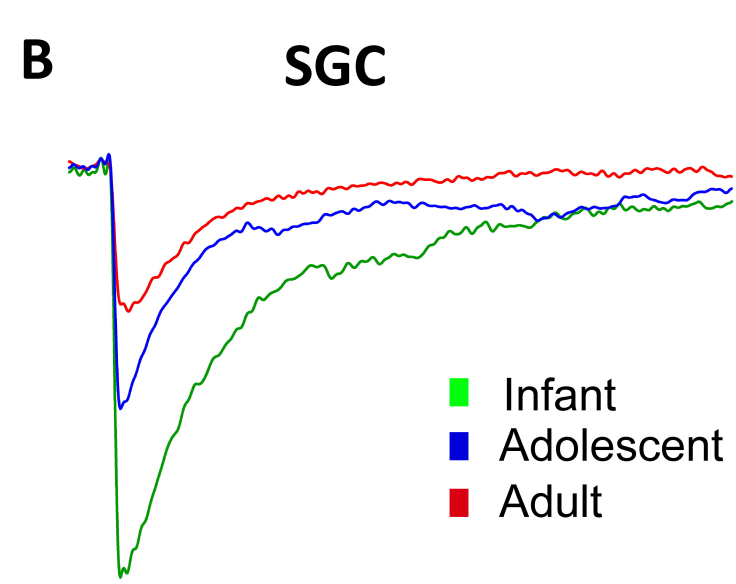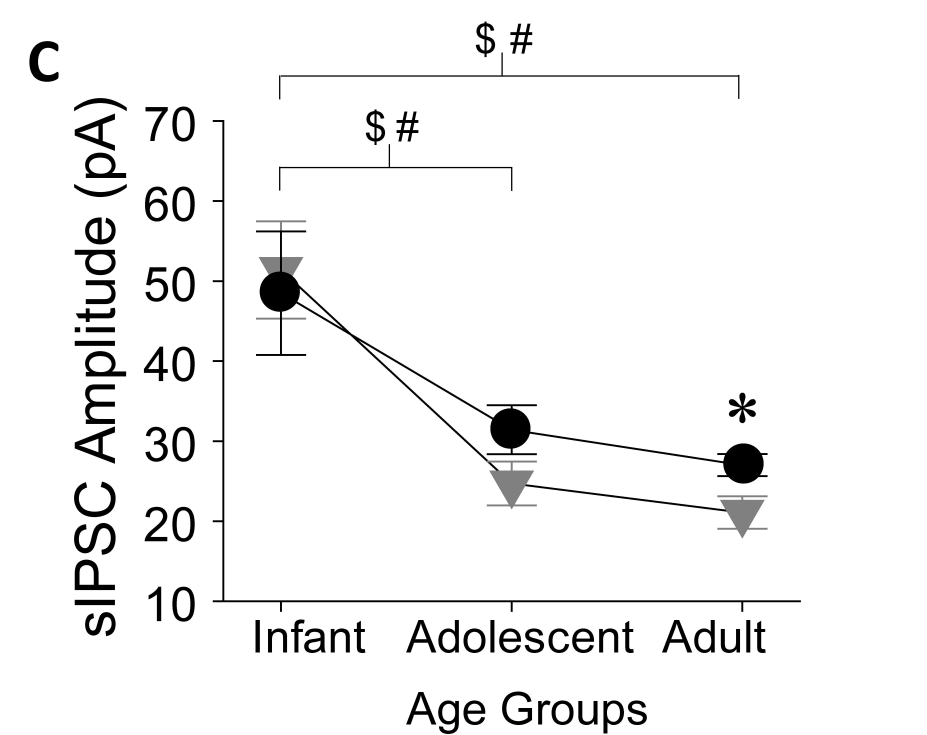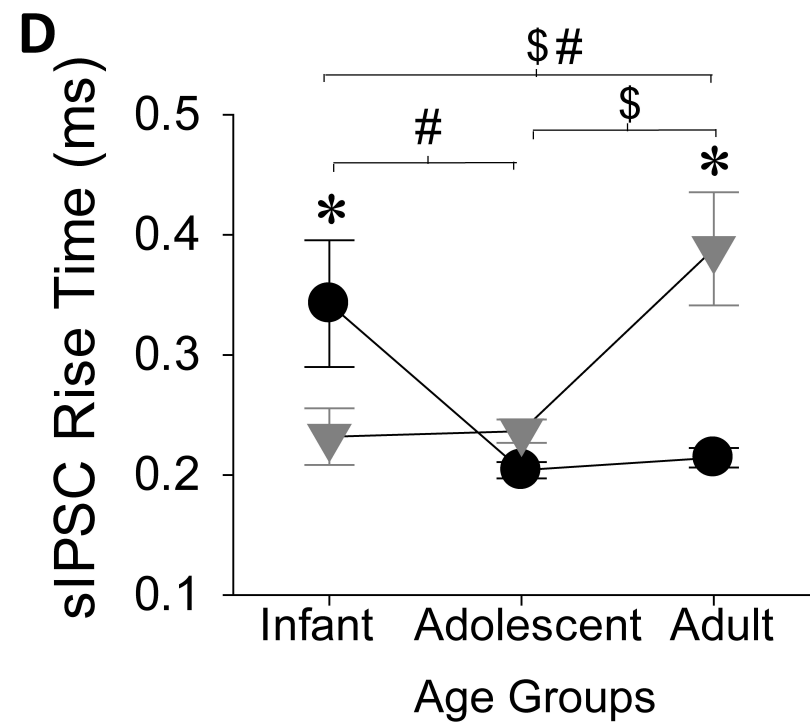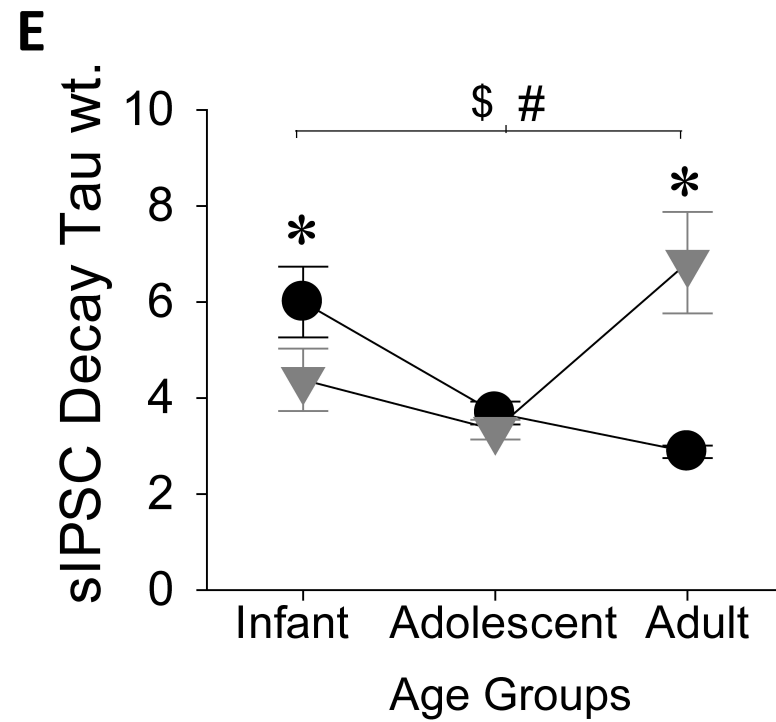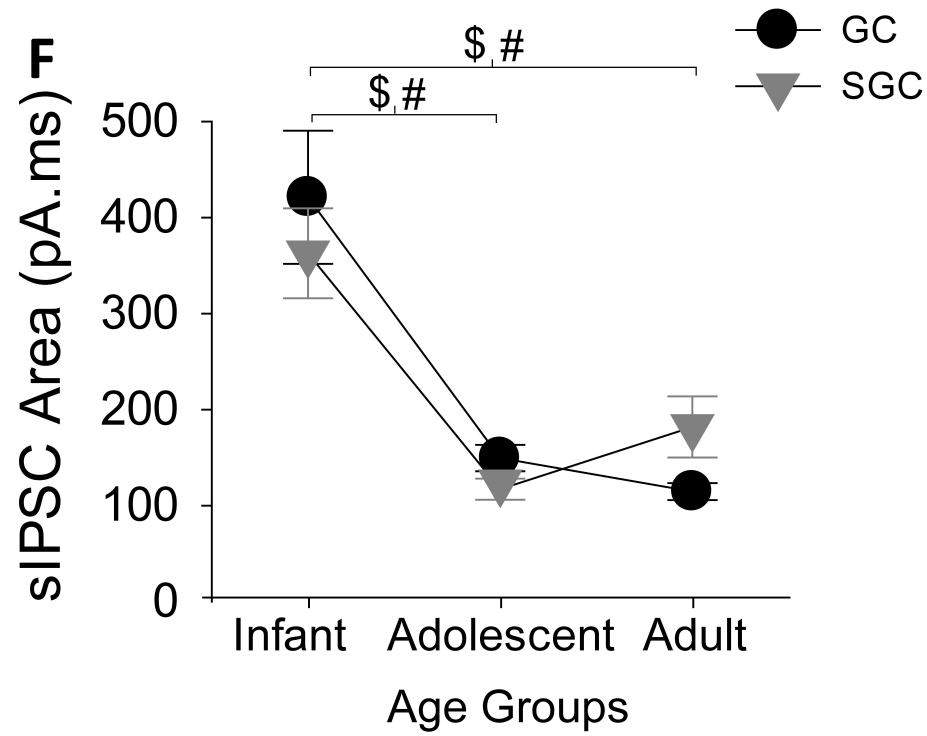

**GC****SGC**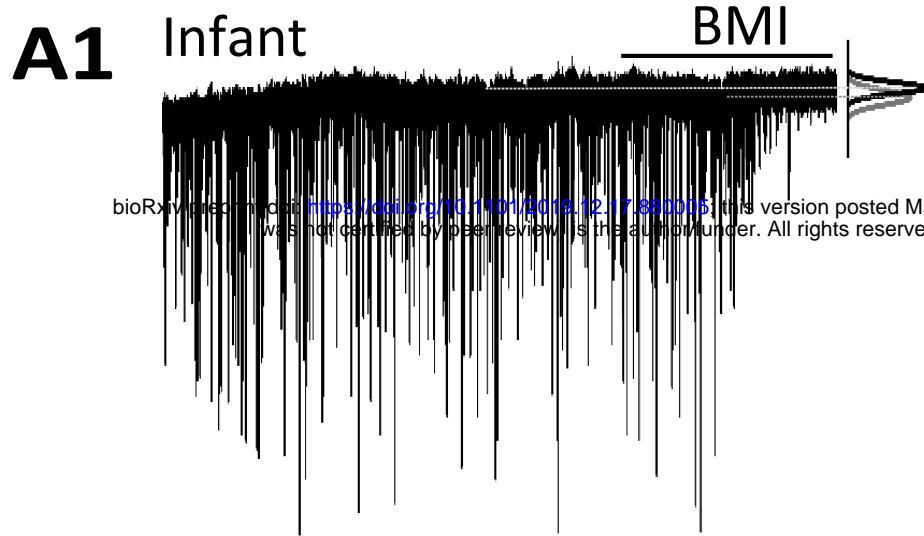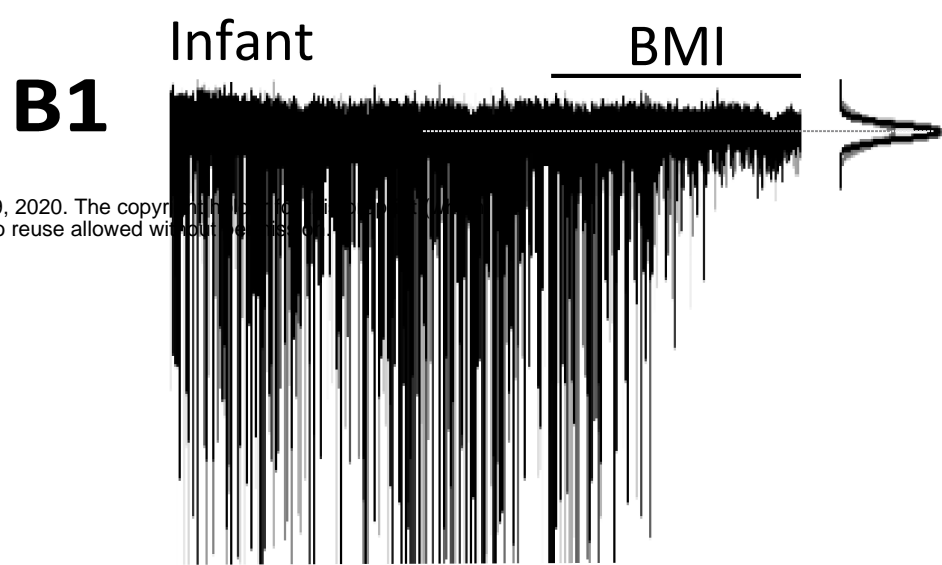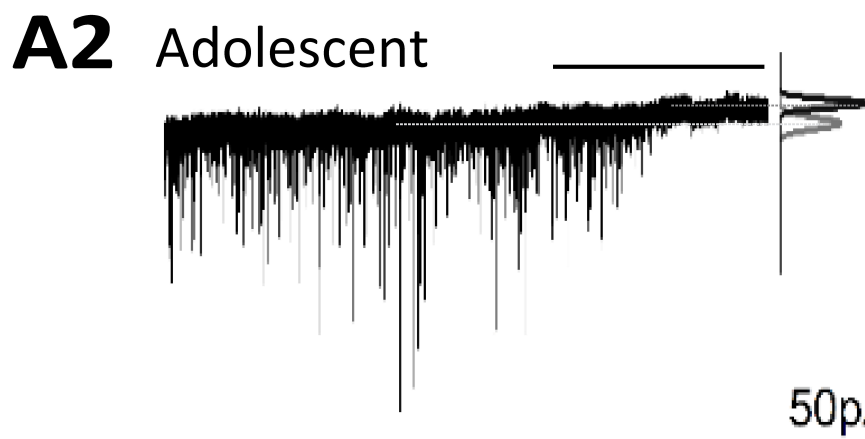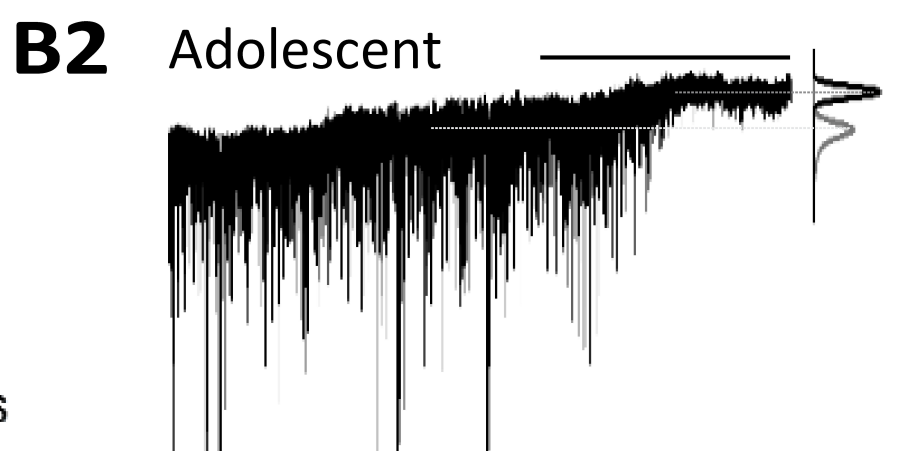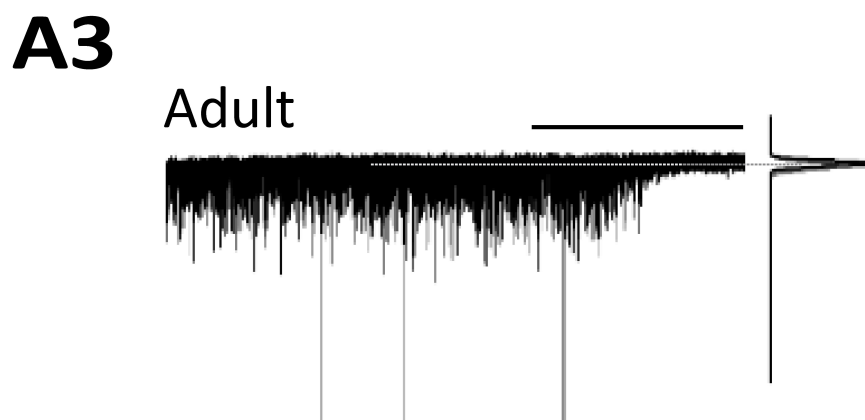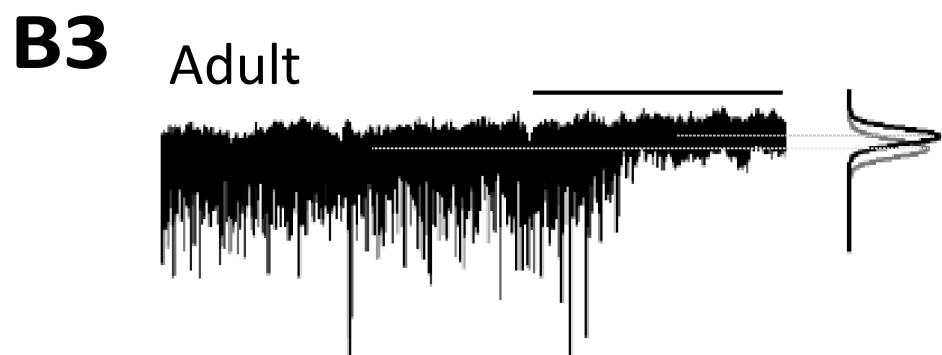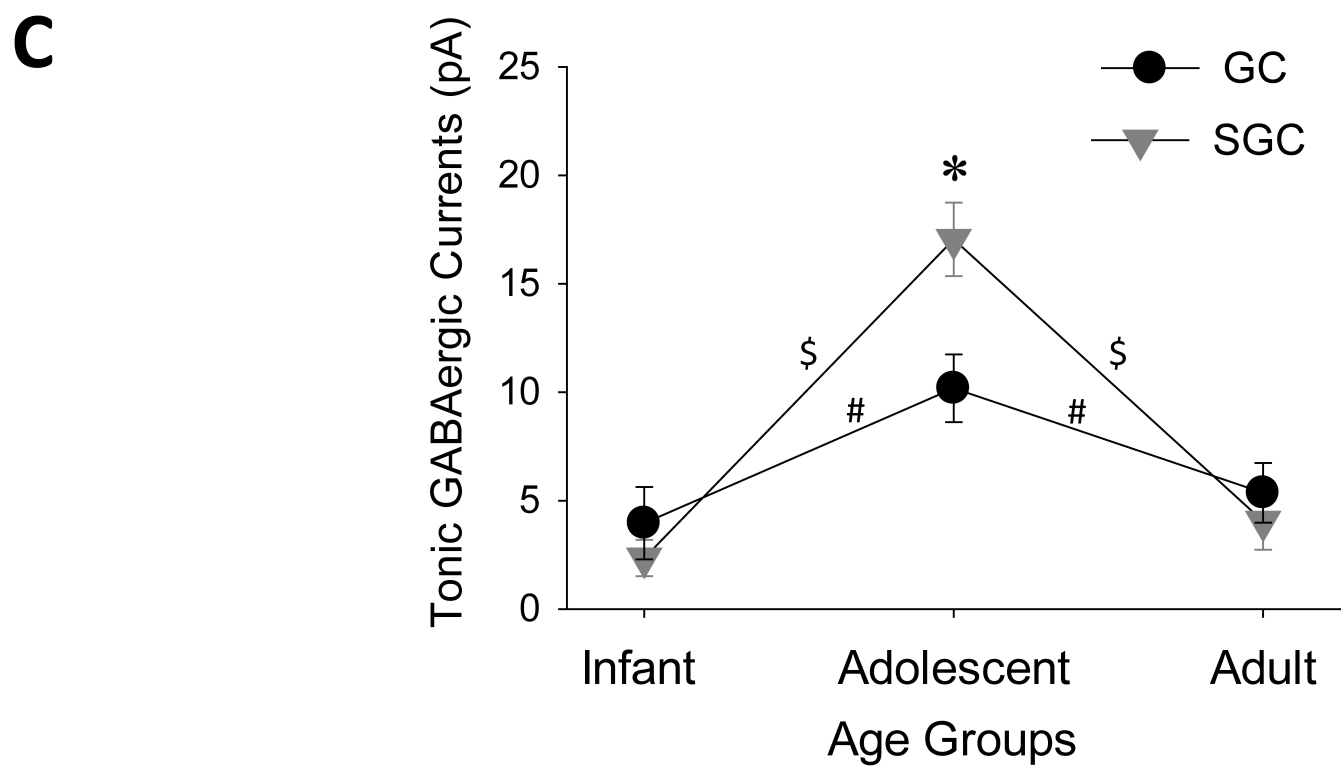



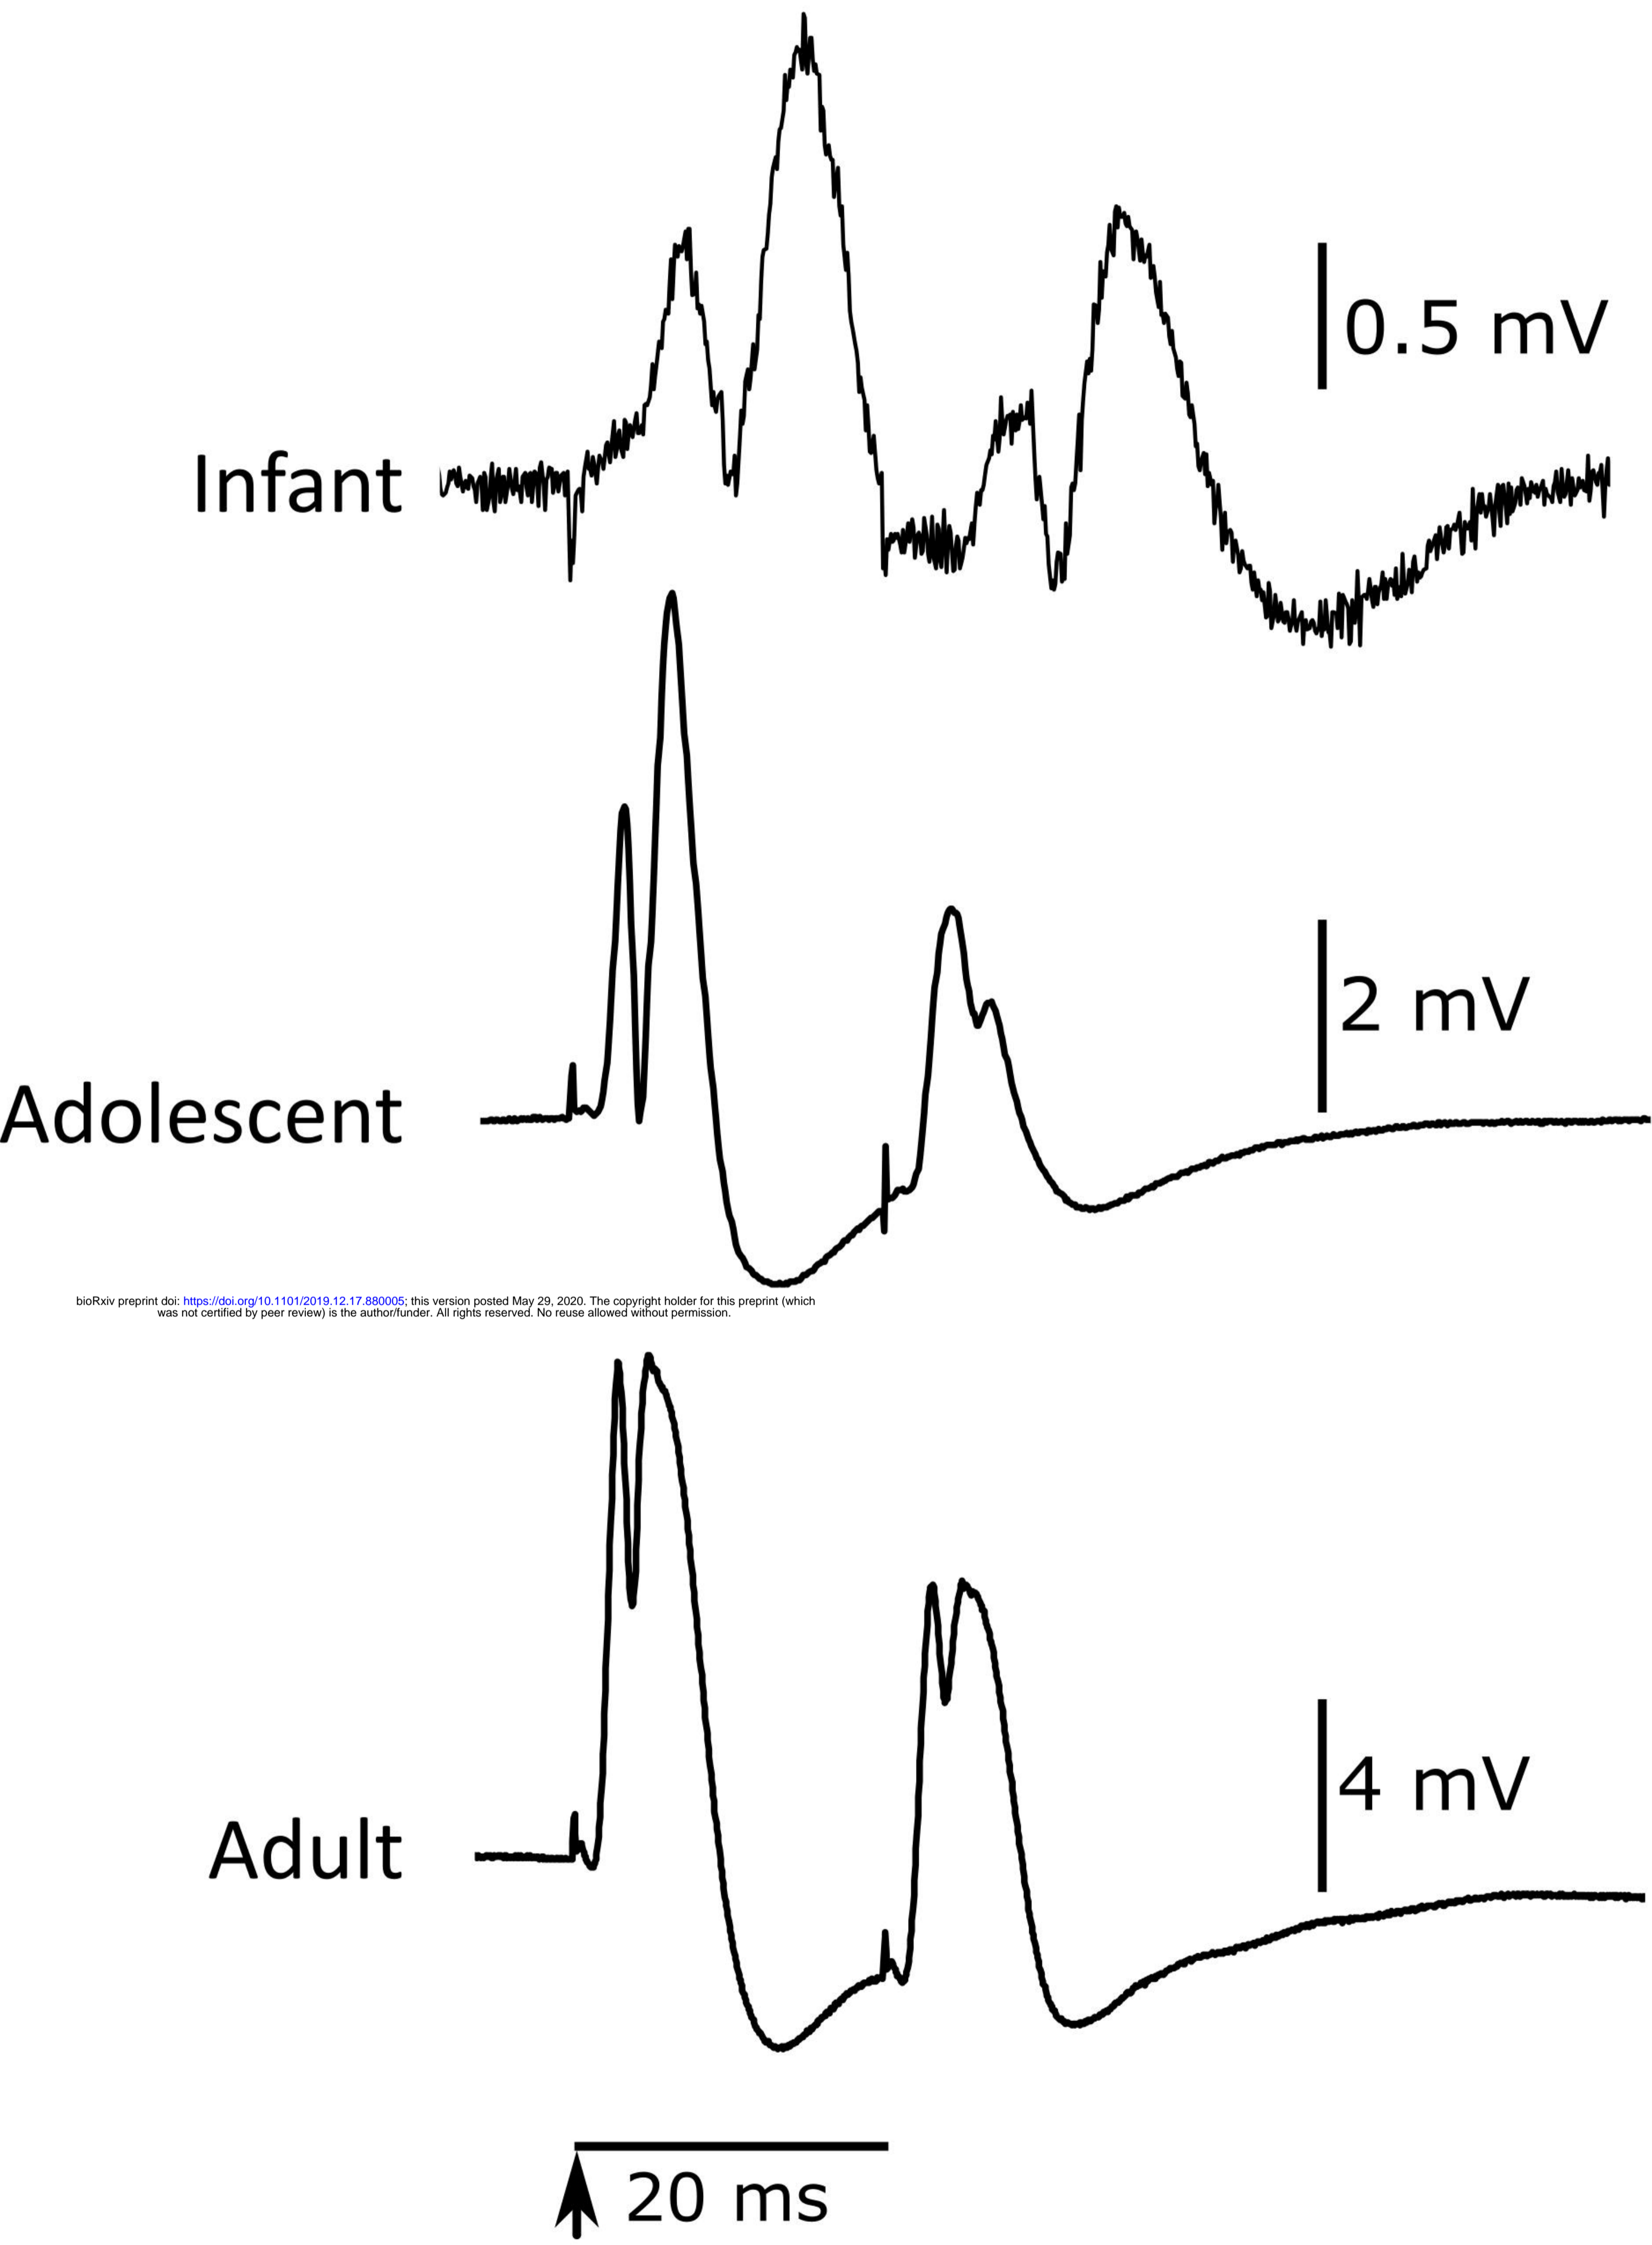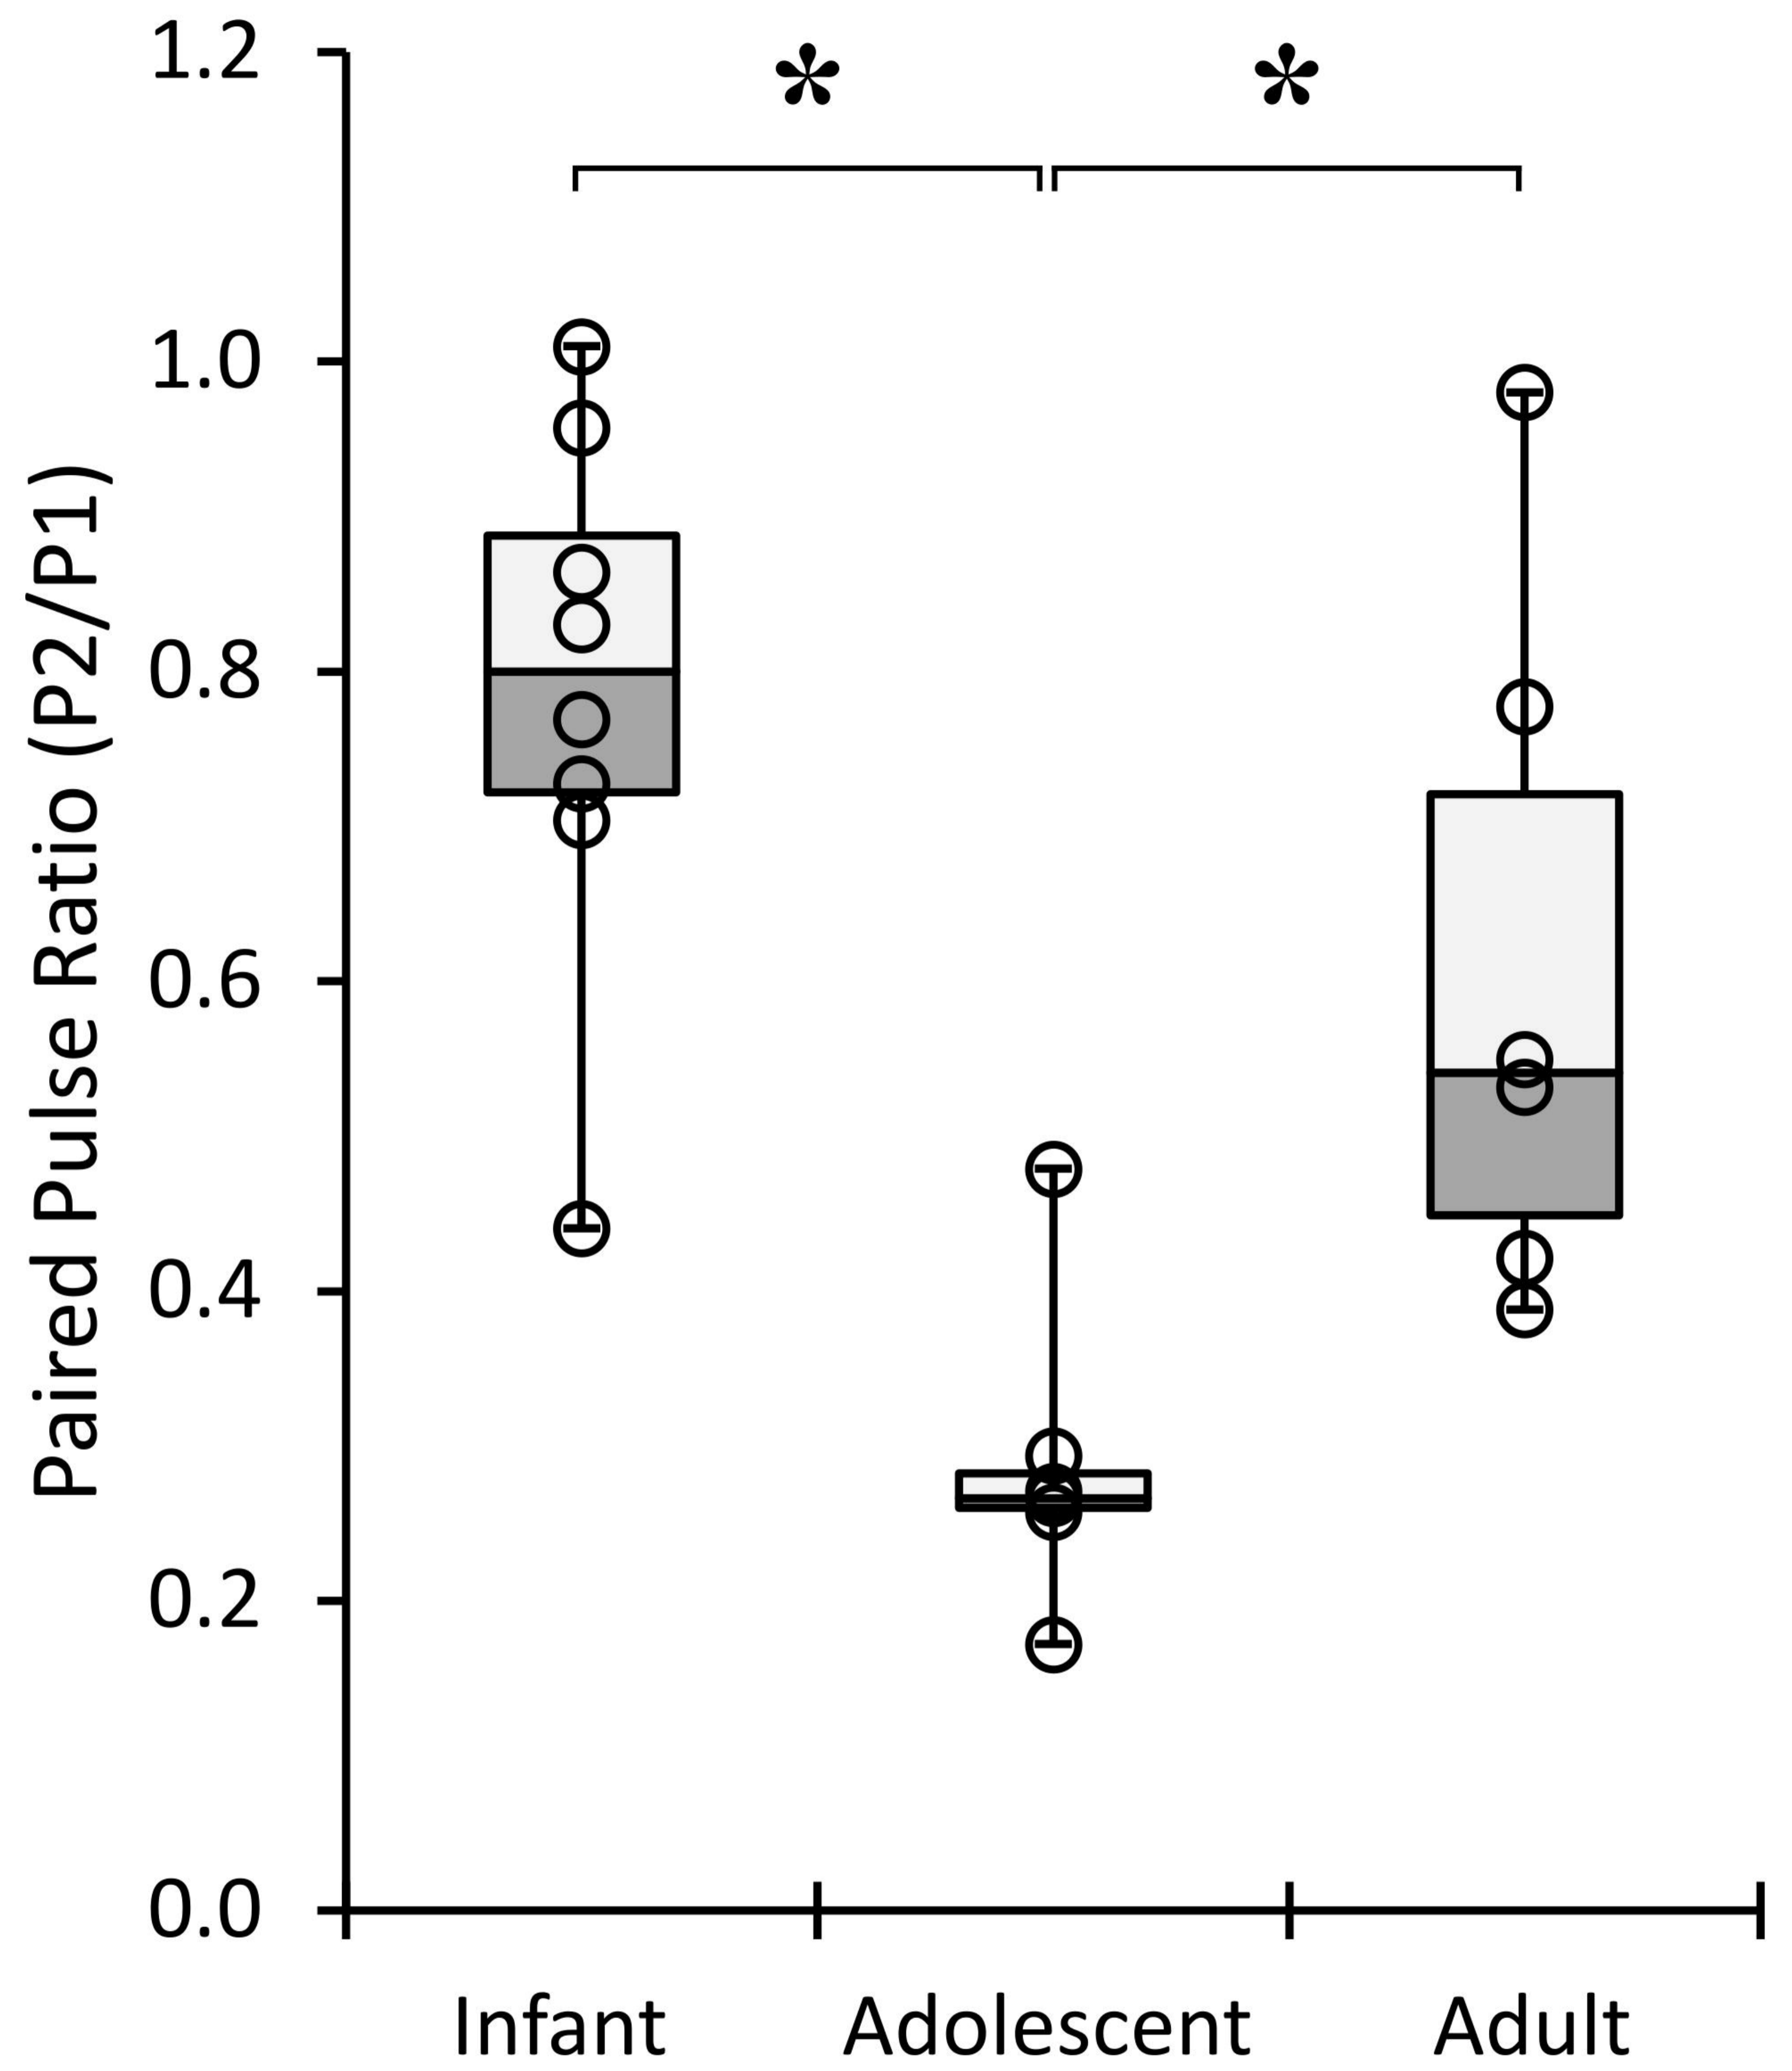

Source: https://www.biorxiv.org/content/biorxiv/early/2020/05/29/2019.12.17.880005.full.pdf
